1  
2  
3  
4  
5  
6  
7  
8  
9  
10  
11  
12  
13  
14  
15  
16  
17  
18  
19  
20  
21  
22  
23  
24  
25  
26  
27

**TITLE**

**Full Title: Establishing RNA-RNA interactions remodels lncRNA structure and promotes  
PRC2 activity**

Short title: RNA-RNA interactions regulate PRC2 activity switch

**Authors**

Maggie M. Balas<sup>1,2,3</sup>, Erik W. Hartwick<sup>2,3,4</sup>, Chloe Barrington<sup>1,2,3</sup>, Justin T. Roberts<sup>1,2</sup>, Stephen K. Wu<sup>1,2</sup>,  
Ryan Bettcher<sup>2</sup>, April M. Griffin<sup>2</sup>, Jeffrey S. Kieft<sup>1,2,3</sup>, and Aaron M. Johnson<sup>1,2,3\*</sup>

**Affiliations**

**1** Molecular Biology Program.

**2** Department of Biochemistry and Molecular Genetics.

**3** RNA Bioscience Initiative University of Colorado Denver Anschutz Medical Campus 12801 East 17<sup>th</sup>  
Ave., Aurora, CO, United States.

**4** Current address, Columbia University Department of Chemistry, New York, NY, United States.

\*Corresponding Author

Aaron M. Johnson, PhD

e-mail: [Aaron.m.johnson@CUAnschutz.edu](mailto:Aaron.m.johnson@CUAnschutz.edu)

Tel: +1(303)724-3224

28 **ABSTRACT**

29 Human Polycomb Repressive Complex 2 (PRC2) catalysis of histone H3 lysine 27 methylation at certain  
30 loci depends on long noncoding RNAs (lncRNAs). Yet, in apparent contradiction, RNA is a potent catalytic  
31 inhibitor of PRC2. Here we show that intermolecular RNA-RNA interactions between the lncRNA HOTAIR  
32 and its targets can relieve RNA inhibition of PRC2. RNA bridging is promoted by heterogenous nuclear  
33 ribonucleoprotein B1, which uses multiple protein domains to bind HOTAIR regions via multi-valent  
34 protein-RNA interactions. Chemical probing demonstrates that establishing RNA-RNA interactions  
35 changes HOTAIR structure. Genome-wide HOTAIR/PRC2 activity occurs at genes whose transcripts can  
36 make favorable RNA-RNA interactions with HOTAIR. We demonstrate that RNA-RNA matches of  
37 HOTAIR with target gene RNAs can relieve the inhibitory effect of a single lncRNA for PRC2 activity after  
38 B1 dissociation. Our work highlights an intrinsic switch that allows PRC2 activity in specific RNA contexts,  
39 which could explain how many lncRNAs work with PRC2.

40

## 41 INTRODUCTION

42 Chromatin regulation can depend on long noncoding RNA (lncRNA) transcripts(1,2), though in many  
43 cases the exact mechanism of action for the RNA is unclear. The most well-established example of  
44 lncRNA regulation of chromatin is via the Xist RNA that is required for silencing of one copy of the X  
45 chromosome in female mammals(3). Another more recent example of a lncRNA associated with  
46 chromatin-based silencing is the HOTAIR transcript(4). Both of these lncRNAs are associated with the  
47 activity of the histone methyltransferase complex Polycomb Repressive Complex 2 (PRC2), which is  
48 involved in facultative heterochromatin formation(5). The chromatin of the inactive X chromosome and of  
49 HOTAIR-repressed genes is marked in a lncRNA-dependent manner by histone H3 lysine 27  
50 trimethylation, the product of PRC2. There is active debate in the field as to how these lncRNAs regulate  
51 PRC2(6). Recent evidence favors a model where Xist “tunes” PRC2 activity only after PRC2 recruitment,  
52 while recruitment itself is mediated by other mechanisms(7). Transcription is also reduced by Xist and  
53 HOTAIR independent of PRC2(8,9), consistent with low levels of transcription promoting PRC2  
54 activity(10). PRC2 binds to single-stranded RNA (ssRNA) with a preference of G-tracts and G-  
55 quadruplexes(11). The prevalence of G-tracts, especially at the 5’ end of genes(12), explains why PRC2  
56 interacts with many pre-mRNAs(13), perhaps sampling nascent transcripts on chromatin(14) due to  
57 relatively fast on and off rates for RNA binding(15). When RNA binds to PRC2, the methyltransferase  
58 activity for nucleosomes is inhibited(16,17), suggesting that some specific additional context is required  
59 for PRC2 activity when RNAs such as Xist or HOTAIR are associated at chromatin that is methylated by  
60 PRC2.

61  
62 Specificity of PRC2 activity is multi-faceted and differs depending on the organism and whether initiating  
63 or maintaining heterochromatin. In *Drosophila*, PRC2 is largely dependent on a small set of specific DNA  
64 binding proteins to recruit the complex for initiation of heterochromatin (*de novo* methylation)(5).  
65 Maintenance of H3K27me3 is facilitated by the ability of the EED subunit of PRC2 to recognize  
66 H3K27me3, recruiting and stimulating PRC2 at previously-established heterochromatin regions(5). This  
67 mechanism is thought to play a role in spreading and maintenance of methylation, though DNA binding

68 proteins are still essential in this maintenance mechanism as well(5). In humans, PRC2 recruitment can  
69 occur by multiple, sometimes overlapping, mechanisms including DNA binding proteins with lower  
70 specificity that work in combination with each other or other co-factors such as chromatin-associated long  
71 noncoding RNA(5). The complex nature of PRC2 recruitment in mammals, often necessitating multiple  
72 molecular mechanisms for action, has made it difficult to establish basic rules for PRC2 catalytic activity,  
73 especially in *de novo* initiation of H3K27me3-triggered heterochromatin.

74

75 The finding that PRC2 binds with significant affinity to nearly every naturally-occurring lncRNA and mRNA  
76 tested(13,16,17), which then inhibits nucleosome methylation, has called into question the specificity of  
77 lncRNAs that were suggested to work with PRC2 to silence chromatin. However, these findings did help  
78 establish that the RNA being produced by an RNA polymerase on chromatin, nascent RNA, would be an  
79 intrinsic inhibitor of PRC2 activity(16), preventing initiation of heterochromatin at active genes. In fact,  
80 tethering a high-affinity RNA substrate for PRC2 directly to chromatin in the nucleus actively antagonizes  
81 PRC2 activity at normal target genes(12), due to the higher affinity of PRC2 for single RNAs with G-tracts  
82 than for chromatin(15,18). It has been proposed that the binding of PRC2 to nascent RNA may allow the  
83 complex to sample the landscape of the genome, searching for a context where PRC2 activity is  
84 promoted(13,14,19). This may occur through encounter of H3K27me3, guiding PRC2 to pre-established  
85 heterochromatin and allowing PRC2 activity(20). For *de novo* heterochromatin formation, it is less clear  
86 how the nascent RNA-inhibited PRC2 is activated. One model suggests that transcription shut down is  
87 required for PRC2 activity(10). This model is supported by the demonstrated antagonism of PRC2 by  
88 histone modifications of highly-active genes and nascent RNA(16,21). While both Xist and HOTAIR can  
89 turn off transcription upstream of PRC2 activity(8,9), the association of both of these lncRNAs with  
90 chromatin promotes H3K27me3 at lncRNA target loci. Therefore, even if the gene is repressed and little  
91 nascent RNA is present, the lncRNA is at the chromatin locus. Regardless of how PRC2 is recruited, Xist  
92 and HOTAIR RNAs inhibit PRC2. Therefore, lncRNA-induced transcriptional repression does not resolve  
93 the issue that an inhibitory chromatin-associated RNA is present at the site of PRC2 activity.

94

95 RNA and chromatin compete for PRC2 binding(15,18). Specifically, the linker DNA between nucleosomes  
96 competes with RNA(15). At equimolar nucleotide concentrations, ssRNA wins the competition for PRC2  
97 binding over chromatin(15), which explains the inhibitory effect of RNA for PRC2 activity. The affinity of  
98 PRC2 for a ssRNA is much higher than for a hairpin version of the same nucleotide content(11),  
99 suggesting a more favorable context for chromatin to compete. Within the PRC2 mechanism of sampling  
100 chromatin via nascent RNAs and associating with lncRNAs on chromatin, we hypothesize there may be  
101 a context for double-stranded RNA that may tip the balance from RNA to chromatin for productive PRC2  
102 interaction.

103

104 Double-stranded RNA (dsRNA) occurs in the nucleus, resulting from multiple mechanisms including intra-  
105 and inter-molecular RNA-RNA interactions. lncRNAs can make intermolecular RNA-RNA interactions  
106 with different types of transcripts. For example, Xist pairs with its antisense RNA, TsiX, during X  
107 inactivation(22). We have previously shown that HOTAIR can interact directly with target gene RNA, such  
108 as JAM2, through an imperfect RNA-RNA base-pairing match sequence(23). This specific matching  
109 region within the sequence of HOTAIR is predicted to have a propensity for stable RNA-RNA interactions  
110 with known target transcripts(24). In fact, the region is a “hotspot” for RNA-RNA interactions as identified  
111 by computational prediction querying HOTAIR against the entire mRNA transcriptome(25). Interestingly,  
112 this “hotspot” overlaps a region within HOTAIR that was found to be conserved across vertebrates (except  
113 teleosts) with potential for RNA-RNA interaction with a HOXD transcript(26). HOTAIR RNA-RNA  
114 interaction was discovered due to its association with the RNA binding protein (RBP), heterogeneous  
115 nuclear ribonucleoprotein (hnRNP) B1. Importantly, hnRNP A2/B1 was found to regulate HOTAIR-  
116 dependent PRC2 activity in cells. Furthermore, the B1 isoform was found to bind preferentially to HOTAIR  
117 and its target transcripts over A2(23). This protein has two tandem RNA recognition motif (RRM) domains  
118 that can associate in a head-to-tail dimer, binding two RNAs in an anti-parallel nature(27), suggesting a  
119 mechanism to promote RNA-RNA base-pairing interactions. We have previously shown that B1 can  
120 promote RNA-RNA interactions between HOTAIR and an RNA from a target gene, JAM2, which  
121 suggested that RNA-RNA interactions have a role in chromatin regulation by PRC2(23) (Fig. 1A), though

122 the underlying mechanism behind this has remained unclear. LncRNAs such as Xist and HOTAIR can  
123 adopt favorable structured states(28,29), presenting an additional challenge for any proposed  
124 intermolecular RNA matching where intramolecular interactions occur.

125

126 In the current study, we gain mechanistic insight into how B1-mediated RNA-RNA interactions can  
127 modulate HOTAIR structure and function to promote PRC2 activity. We determine the necessary features  
128 of hnRNP B1 for HOTAIR interaction and identify the specific regions of HOTAIR that interact with B1.  
129 We use chemical probing of HOTAIR secondary structure to highlight the structural changes that occur  
130 when B1 and an RNA-RNA match engage with HOTAIR. We find that genome-wide HOTAIR-dependent  
131 PRC2 activity occurs at loci whose transcripts make more-favorable RNA-RNA interactions with HOTAIR.  
132 Finally, we demonstrate that specific intermolecular RNA-RNA interaction relieves the inhibitory nature of  
133 HOTAIR RNA for PRC2 methyltransferase activity on nucleosomes. By dissecting these molecular  
134 changes to RNA structure, we highlight a switch that can result in PRC2 recruitment and activation by a  
135 lncRNA on chromatin. This may be a general mechanism that applies to many contexts where RNA plays  
136 a role in potentiating PRC2 activity.

137

138

## 139 **RESULTS**

### 140 **RNA-RNA interaction is directly promoted by hnRNP B1 but not the A2 isoform**

141 We have previously identified hnRNP A2/B1 as an important component of HOTAIR-dependent PRC2  
142 activity in breast cancer. We found B1 was enriched preferentially in RNA pulldown assays with HOTAIR  
143 using nuclear extracts and we subsequently demonstrated direct *in vivo* binding of hnRNP B1 to HOTAIR,  
144 over the highly abundant isoform hnRNP A2. Additionally, B1 also bound preferentially to HOTAIR target  
145 transcripts, over A2(23,24). B1 differs from A2 by the inclusion of exon 2, which encodes 12 unique amino  
146 acids on the N-terminus (Fig. 1B). To further profile the recognition mechanism of HOTAIR by hnRNP B1  
147 we first tested whether the isoform preference, B1 over A2, that was observed in the nuclear extract  
148 pulldown was recapitulated with purified protein. Using recombinant A2 or B1 proteins, expressed in *E.*  
149 *coli*, we performed *in vitro* HOTAIR pulldown assays and found that B1 binds preferentially to HOTAIR

150 compared to A2 (Fig. 1B). Even a three-fold increase in A2 concentration did not recapitulate the same  
151 level of binding as B1 to HOTAIR. Little to no binding was observed for B1 to equal amounts of the control  
152 non-coding RNA, of similar size and GC content, that corresponds to the anti-sense sequence of the  
153 luciferase mRNA (Anti-luc), which we have used previously as a control(23). We conclude from this that  
154 the B1-specific N-terminal domain (NTD), directly confers preferential binding to HOTAIR (Fig. 1B). The  
155 presumed position of the NTD, based on the N-terminus position in the A2 isoform crystal structure(27)  
156 would place the NTD in proximity to bound RNA (Fig. 1C). This suggests the B1 NTD itself directly  
157 interacts with RNA as an extension of the RRM, to increase specificity, affinity, or both. Next we evaluated  
158 B1 vs. A2 in the in vitro RNA-RNA interaction assay we have previously used to characterize matching  
159 with the HOTAIR target mRNA JAM2. Briefly, the RAT-tagged JAM2 match RNA fragment was incubated  
160 with full-length HOTAIR or Anti-luc control RNA in the presence or absence of hnRNP A2 or B1, and then  
161 affinity purified via the RAT tag. The association of HOTAIR or Anti-luc with JAM2 was quantified by RT-  
162 qPCR (Fig. 1D). Consistent with previous results, B1 was able to stimulate significant HOTAIR interaction  
163 with the target gene JAM2 RNA and we found that this was not the case for A2. Moreover, B1 was able  
164 to promote a minimal amount of RNA interaction between JAM2 and the Anti-luc control RNA, suggesting  
165 that B1 can bridge two RNA molecules indirectly while they remain separated, not base-paired, as seen  
166 in the crystal structure for A2 (Fig. 1C).

167

### 168 **B1 bridges RNAs in the absence of strong base-pairing potential**

169 The crystal structure of the A2 tandem RRMs bound to RNA revealed a head-to-tail dimer in complex with  
170 two RNAs(27). Each RNA crosses the RRM of one protomer to the next and the two RNAs are aligned in  
171 an antiparallel nature (Fig. 1C). Based off of this RNA arrangement, where the dimer binds two molecules  
172 through single-strand engagement by the RRMs, we asked whether the ability of B1 to promote interaction  
173 of HOTAIR with its targets is dependent on base-pairing between the RNAs. We used the HOTAIR RNA-  
174 RNA interaction assay described above to test this. Matching of HOTAIR with its target does not require  
175 B1 in vitro, as we have previously shown(23). In fact, addition of B1 in our previously published RNA  
176 matching assays only modestly promoted the interaction between the RNAs. To test whether B1 can

177 promote interaction with RNAs that do not have strong complementarity, we reduced the concentration of  
178 the RNAs to promote more stringency and B1 dependence. Under these conditions, B1 stimulates  
179 HOTAIR interaction with the JAM2 target RNA roughly three-fold (Fig. 1F), compared to no significant  
180 background association (Fig. S1A). When the fairly extensive imperfect base-pairing interaction between  
181 JAM2 and HOTAIR is disrupted by deleting or mutating (changing to the complement base) the 64 nt  
182 interaction region on HOTAIR, B1 is able to recover nearly the same level of RNA-RNA interaction as with  
183 wildtype HOTAIR (Fig. 1F). This result suggests that B1 can bridge two RNAs due to the strength of  
184 binding to those individual RNAs and the ability of the dimer to interact with each RNA at the same time.  
185 Complementarity of two RNAs at, or proximal to, the B1 bridge would subsequently promote  
186 intermolecular base-pairing. The HOTAIR-JAM2 match is stable in the absence of B1, suggesting that,  
187 once formed, it would persist after B1 dissociation.

188

### 189 **Single-nucleotide mapping of B1 UV crosslinks to HOTAIR identifies major direct interactions**

190 We used the eCLIP (enhanced Cross-Linking and Immunoprecipitation) method with recombinant B1 and  
191 in vitro transcribed HOTAIR (in vitro eCLIP) to profile the interactions between the two(24). Briefly, UV  
192 crosslinking was performed on pre-incubated B1 and HOTAIR, the sample was digested with a low  
193 amount of RNase to generate RNA fragments that could be reverse transcribed and made into a  
194 sequencing library. The eCLIP protocol involves size selection and downstream ligation of one sequencing  
195 adapter to the 3' end of the cDNA as part of sequencing library preparation (Fig. 2A, S1C). Because a  
196 base that remains cross-linked to an amino acid “scar” can prematurely terminate reverse transcription,  
197 we mapped the termination sites of the in vitro eCLIP sequencing to better refine the specific site of direct  
198 B1 interaction on HOTAIR. The in vitro eCLIP results of B1 binding to HOTAIR revealed multiple regions  
199 with high reverse transcription (RT) stops. We observed six main peaks of RT stops from five locations  
200 on HOTAIR in the size of ~25-100 nucleotides (Fig. 2B). Four of these peaks fell within domain 1 of  
201 HOTAIR (nucleotides 1-530), suggesting HOTAIR domain 1 is important for B1-mediated function (Fig.  
202 2B). Controls with non-crosslinked protein and a crosslinked non-binding protein yielded background  
203 levels of recovered RNA with poor mapping capability (Fig. S1D) and RT of HOTAIR alone demonstrated



204 that the B1 RT stops are specific (Fig. S1E). We conclude from this that B1 binds to multiple distinct  
205 locations within domain 1 of HOTAIR. Based on other lower-frequency RT stops that still produce a peak,  
206 we suspect additional secondary interactions are made, potentially facilitated by proximity of RNAs in  
207 tertiary structure near the primary interaction sites.

208

### 209 **B1 C-terminal glycine-rich domain participates in HOTAIR engagement**

210 The crystal structure of the A2 RRMs demonstrates a minimal complex for bridging of RNAs (Fig. 1C).  
211 We have also demonstrated that the B1 N-terminal domain is required for efficient HOTAIR engagement  
212 and promotion of RNA-RNA interactions (Fig. 1B). Though these interactions are important features in  
213 establishment of RNA-RNA interactions, we wished to also test other features of B1 that may participate  
214 in this activity. In addition to the NTD and tandem RRMs, B1 has a run of “RGG” motifs proximal to the  
215 second RRM domain, as well as a low-complexity glycine-rich C-terminal domain. We generated minimal  
216 RRM constructs for B1 and A2, an alanine substitution of all five RGGs in the full-length construct, and a  
217 construct with the C-terminal glycine-rich domain deleted. Equal amounts of protein loading and HOTAIR  
218 recovery is demonstrated by Coomassie gel and qPCR quantification. RNA pulldown experiments  
219 demonstrated a clear requirement for the C-terminal portion of B1, however the RGG motifs were  
220 unnecessary, suggesting the unstructured glycine-rich domain is required for tight binding to HOTAIR  
221 (Fig. 2C). The additional amino acids within glycine-rich domains have been proposed to influence the  
222 interplay of this region with other RBPs or RNA (30,31).

223

### 224 **Chemical probing highlights B1 interaction with HOTAIR**

225 To further investigate mechanistically how RNA-RNA interactions are facilitated, we performed chemical  
226 probing experiments on HOTAIR domain 1 with the JAM2 RNA match (62 nt) and/or B1 (Fig. 3A). RNA  
227 was chemically modified using 1-methyl-7-nitroisatoic anhydride (1M7), which reacts with the 2'-hydroxyl  
228 of the RNA backbone to form adducts on accessible or flexible nucleotides, primarily in single-stranded  
229 regions of the RNA (Fig. 3A). Adduct formation was quantified using primer extension via reverse  
230 transcription, where RT stops equate to reactivity to the modifier. Due to the strong RT stop introduced

231 when HOTAIR and JAM2 interact, we had to include JAM2 removal steps to the protocol to generate  
232 complete reactivity data (Supplementary Fig. S2). To analyze the capillary electrophoresis data, HiTRACE  
233 RiboKit (32-36) was used and subsequently normalized using published methods(37). The normalized  
234 reactivity values were evaluated for each experimental condition: HOTAIR only, HOTAIR + JAM2,  
235 HOTAIR + B1, HOTAIR + B1 + JAM2; and for control conditions HOTAIR + Poly A and HOTAIR + BSA  
236 (Fig. 3A,B, Supplementary Fig. S4). We observed reproducible chemical reactivity patterns across all  
237 conditions (see error trace plotted in Supplementary Fig. S3 and Supporting File SF1). We were able to  
238 detect subtle and larger changes in regions of HOTAIR upon the addition of JAM2 RNA and/or B1,  
239 consistent with our previous data and predictions for establishment of RNA-RNA interactions (Fig. 3B,C).  
240 Interestingly, we found the addition of B1 reduced chemical probing reactivity in many regions of HOTAIR  
241 (Fig. 3B,C). This decreased reactivity was highlighted at the B1-interaction sites identified from our in vitro  
242 eCLIP analysis (highlighted in blue, 141-172 nt, 304-314 nt, 460-523 nt) (Fig. 3D,E). These results support  
243 a model of multiple prominent B1 interactions with HOTAIR and indicate that the eCLIP and chemical  
244 probing data are in agreement. The extent of reduced reactivity we observed may be explained by either  
245 1) a broader direct influence of the protein on reactivity, perhaps through proximity in three-dimensional  
246 space, or 2) a significant change to RNA structure induced by B1, perhaps increased secondary structure,  
247 leading to decreased 1M7 reactivity in regions of HOTAIR that B1 does not bind directly.

248

#### 249 **Establishment of RNA-RNA interactions alters HOTAIR structure**

250 We next generated a difference map of chemical probing conditions, to quantify reactivity changes  
251 compared to HOTAIR RNA alone (Fig. 4A). To highlight regions of change, we employed a sliding-window  
252 analysis, trained using control conditions (see Supporting File SF4 and Materials and Methods), to identify  
253 regions of change above a control threshold value. We mapped these regions of change, according to  
254 each experimental condition, onto the previously determined secondary structure model of HOTAIR  
255 domain 1(28) (Fig. 4B-E). Analysis of HOTAIR + JAM2 demonstrated that JAM2 pairing with HOTAIR  
256 changes the 1M7 reactivity of HOTAIR in the regions of the secondary structure that surround the JAM2  
257 base-pairing site (nucleotides 245-306) (Fig. 4B). This includes reduced reactivity across the base-pairing

258 site, consistent with the strong complementarity of the intermolecular RNA base-pairing match. As noted  
259 above, addition of B1 caused significant changes in reactivity to a majority of HOTAIR nucleotides, as  
260 evidenced by the many highlighted regions on the secondary structure (Fig. 4C). Of note, although the  
261 general trend of nucleotide reactivity was downward, B1 caused higher reactivity at specific regions of  
262 HOTAIR, suggesting these regions are more exposed and single-stranded.

263

264 The combination of both JAM2 and B1 also generated regions of altered reactivity for HOTAIR RNA,  
265 especially surrounding the JAM2 interaction site (Fig. 4D,E). Since B1 alone changes reactivity for so  
266 many nucleotides of HOTAIR, we subtracted those changes from the JAM2/B1 changes to mask these  
267 (Supplementary Fig. S5). By doing this, we can see that the JAM2/B1 condition is significantly different  
268 from B1 alone, despite the large extent of changes with B1 alone. The profile of this B1-subtracted data  
269 do not resemble the JAM2 condition. This suggests that JAM2 is able to either synergize with, or  
270 counteract, the effects of B1 alone. This is further emphasized by subtracting both JAM2 and B1 alone  
271 conditions from the JAM2/B1 reactivity (Fig. S5, bottom). This double-subtraction resulted in significant  
272 changes that persist, which cannot be accounted for by additive effects of the individual conditions.  
273 Altogether, the chemical probing data clearly show that the steps in establishing RNA-RNA interactions  
274 do remodel HOTAIR structure and suggest that the B1 and the intermolecular RNA base-pairing have  
275 individual and potentially synergistic effects on changing HOTAIR structure.

276

277

### 278 **Conversion from ssRNA to dsRNA promotes PRC2 activity**

279 It is not clear how PRC2 goes from RNA-mediated inhibition to an enzymatically active state in situations  
280 where a lncRNA like Xist or HOTAIR are known to be present and no pre-existing H3K27 methylation has  
281 occurred. PRC2 has been shown to have a strong affinity for ssRNA, but has a weaker affinity for duplex  
282 RNA, like that found in perfectly base-paired stem-loop structures(11). We analyzed RNA-RNA interaction  
283 predictions between HOTAIR and the entire transcriptome(24,25) and compared them to previously  
284 identified HOTAIR-dependent PRC2 targets in a model of HOTAIR-overexpressing triple negative breast

285 cancer cells(23,38). Genes that acquired new PRC2 activity when HOTAIR was overexpressed were  
286 biased towards those with transcripts that have more-favorable RNA-RNA interaction propensity with  
287 HOTAIR (Fig. 5A). This led us to hypothesize that duplex RNA might provide the correct context for PRC2  
288 enzymatic activity by allowing PRC2 to transfer to chromatin via lower affinity binding of dsRNA. To  
289 determine this, we performed histone methyltransferase (HMTase) assays with single-stranded or double-  
290 stranded HOTAIR RNA and evaluated levels of H3K27me3. We first assessed optimal H3K27me3 activity  
291 in these assays using di-nucleosome templates composed of two 601 sequences surrounding 40-bp of  
292 linker DNA (Fig. 5B), recombinant PRC2 complex (Fig. 5C) and the co-factor JARID2 (Fig. 5D). We next  
293 annealed HOTAIR RNA with a titration of reverse complement RNA to form perfect duplex RNA and  
294 introduced these into the HMTase assays (Fig. 5E). We observed a distinct reduction in H3K27me3 in the  
295 presence of ssRNA vs no RNA. As we increased the amount of reverse complement RNA, H3K27me3  
296 levels increased in a manner concurrent with formation of dsRNA (Fig. 5E). These results suggest that  
297 while a ssRNA inhibits PRC2 activity, formation of a duplex between the inhibitory RNA and its match is  
298 able to relieve this inhibition and promote PRC2-mediated H3K27me3.

### 299 300 **HOTAIR target RNA-RNA matches promote PRC2 activity**

301 Fully-duplex dsRNA was used above, which may be relevant for some lncRNA contexts, but HOTAIR  
302 makes imperfect matches with RNA targets. To begin to address if HOTAIR imperfect RNA-RNA matches  
303 with target mRNA could also promote PRC2 catalytic activity, we evaluated the HOTAIR matches with  
304 endogenous targets JAM2 and HOXD10 (Fig. 6A). Consistent with previous results, HOTAIR alone was  
305 able to inhibit PRC2 activity. When increasing ratios of HOTAIR-JAM2 duplex were present, the match  
306 relieved the inhibitory effect of the single-stranded HOTAIR fragment alone, thereby stimulating  
307 H3K27me3 (Fig. 6B). Equal molar ratios of HOTAIR to JAM2 resulted in the highest levels of H3K27me3  
308 promotion (Fig. 6C). Similar results were observed with the HOTAIR-HOXD10 duplex RNA match (Fig.  
309 6D), with equal molar ratios of match RNA relieving PRC2 inhibition the most (Fig. 6E). Titration of JAM2  
310 or HOXD RNA alone had no effect on PRC2 (Supplementary Fig. S6A-C), highlighting that the duplex

311 formed with HOTAIR RNA is the effector. In contrast, a control PolyA RNA of similar size did not  
312 significantly relieve inhibition (Fig. 6F, Supplementary Fig. S6D).

313

314 The experiments above used RNA fragments surrounding the matching regions. These fragments were  
315 similar in size to the model RNA substrates used in previous biophysical studies of RNA-PRC2  
316 interaction(11). Next we tested a much larger portion of HOTAIR RNA, using the HOTAIR domain 1  
317 sequence (nt 1-530), to evaluate if the JAM2 match was sufficient to relieve inhibition of PRC2 activity.  
318 We found that HOTAIR domain 1 was a more-potent inhibitor of PRC2 by molar ratio, consistent with  
319 longer RNAs binding with higher affinity to PRC2. Strikingly, JAM2 was able to relieve PRC2 inhibition by  
320 this longer RNA (Fig. 6G,H). However, when we substitute HOTAIR domain 1 with a version in which the  
321 JAM2 interaction site is deleted, we observe no relief of inhibition (Fig. 6I, S6E). Together, these results  
322 demonstrate that the formation of dsRNA via HOTAIR matches with known genomic RNA targets like  
323 JAM2 and HOXD10, are sufficient to promote H3K27me3 in vitro. This suggests that endogenous RNA-  
324 RNA interactions between lncRNA and target nascent transcripts could facilitate PRC2 catalytic activity  
325 for gene silencing at specific genomic locations (Fig. 5A).

326

327 Finally, we addressed the contribution of B1 to PRC2 activity that is modulated by RNA-RNA interactions.  
328 Under identical conditions to HOTAIR Domain 1 and a JAM2 titration (Fig. 6D), we found that addition of  
329 B1 did not allow JAM2 to relieve PRC2 inhibition (Fig. 6J,K). This may be due to how B1 normally functions  
330 in a step-wise RNA-RNA interaction mechanism, where the protein facilitates RNA bridges, but must  
331 dissociate before PRC2 inhibition can be relieved. We note that B1 does increase HOTAIR reactivity in  
332 multiple regions, which persist when JAM2 matches to HOTAIR (Fig. 3,4). These exposed regions of  
333 HOTAIR that are induced by B1 may contribute to PRC2 inhibition until B1 dissociates, leaving the  
334 matched RNA state that facilitates relief of PRC2 inhibition by the lncRNA.

335

## 336 **DISCUSSION**

337

338 RNA binding to PRC2 inhibits its catalytic activity(16,17). It has remained unclear how this inhibition is  
339 relieved in contexts where RNA is present in a region of chromatin that has no previously-deposited  
340 H3K27 methylation, including lncRNA-associated loci and genes bearing nascent transcripts. Based on  
341 our previous observation that the HOTAIR lncRNA makes preferential interactions with hnRNP B1(23), a  
342 multi-valent RNA binding protein that promotes RNA-RNA interactions, we have further profiled the  
343 molecular basis of this mechanism and how it relates to the observation that HOTAIR can somehow  
344 promote PRC2 activity when overexpressed in cancers(38). We find that hnRNP B1 uses multiple  
345 domains to engage HOTAIR in a manner that can bridge it to a target gene RNA (Fig. 1-2). When HOTAIR  
346 matches with a target RNA, the lncRNA structure is remodeled by B1 and the matching RNA (Fig. 3-4).  
347 We find that HOTAIR-mediated PRC2 targets make more favorable RNA-RNA interaction with HOTAIR  
348 (Fig. 5A). In turn, the formation of duplex RNA between HOTAIR and its targets limits the ability of the  
349 lncRNA to inhibit PRC2 activity (Fig. 6). When B1 is still present, RNA matching is not sufficient to relieve  
350 PRC2 inhibition, suggesting B1 must dissociate from the RNA for PRC2 activity to be promoted. PRC2  
351 binds to many individual RNAs in the nucleus(5), including nascent transcripts, presumably in an inactive  
352 state. Our results suggest a model where an RNA can be a positive effector of *de novo* PRC2 activity in  
353 a context where RNA-RNA interactions relieve PRC2 inhibition on chromatin (Fig. 7).

354

### 355 **HOTAIR RNA engagement and RNA-RNA bridging by hnRNP B1**

356 The crystal structure of the tandem RRM of hnRNP A2/B1(27) demonstrates a potential for two RNAs to  
357 be engaged by an A2 or B1 dimer in an anti-parallel orientation. While the RRMs likely only bind single-  
358 stranded RNA, the adjacent RNA sequences are in a favorable orientation for base-pairing. This  
359 engagement is inter-molecular in the crystal structure and likely explains the ability of B1 to bring two  
360 RNAs together, even when the base-pairing potential between them is limited (Fig. 1F). There is potential  
361 for the same mode of engagement to work intramolecularly, as well, and this may underlie the multiple  
362 sites of direct interaction we observe for B1 on HOTAIR (Fig. 2B) and the ability of the protein to reduce  
363 chemical reactivity of multiple regions of HOTAIR (Fig. 3). A possible explanation for why the B1 N-  
364 terminal domain promotes HOTAIR binding is because it promotes B1 dimerization. Further work is

365 required to determine if this is the case. The C-terminal domain of B1 is necessary for HOTAIR binding  
366 and thus promotion of RNA-RNA interactions (Fig. 2C). The C-terminus of the related hnRNP A1 can bind  
367 RNA(30,31) and includes an intrinsically-disordered domain that has been shown to self-associate and  
368 phase separate at high concentrations(39). Whether all of these properties are important for the  
369 mechanism we have characterized remains to be determined; however, the ability to self-associate, at  
370 least into a dimeric state, would potentially promote the RRM of two monomers forming the head-to-tail  
371 conformation that can promote RNA-RNA interactions (Fig. 2E).

372

373 We find that B1 cannot be present with the matched RNAs for relief of PRC2 inhibition (Fig. 6 J,K). We  
374 interpret this result by placing the function of B1 upstream in an RNA-RNA interaction mechanism model  
375 that ultimately leads to catalysis of H3K27 tri-methylation and heterochromatin formation (Fig. 7). In this  
376 model B1 must dissociate before PRC2 activity is promoted. The requirement for a matchmaker protein  
377 to “get out of the way” has been proposed in other molecular matchmaker models(40) and is consistent  
378 with the match itself being the ultimate effector, rather than the protein.

379

### 380 **RNA-RNA interactions promote PRC2 activity**

381 The ability of an RNA with base-pairing potential to relieve the inhibition of PRC2 that is imposed by a  
382 single RNA binding event may apply beyond the HOTAIR mechanism. There are multiple examples of  
383 lncRNAs with intermolecular RNA-RNA interaction capability involved in PRC2 activity(2). For example,  
384 some imprinted loci such as *Kcnq1* have antisense transcripts that induce PRC2 activity and repression  
385 occurring coincident with sense transcripts, present in an RNA “cloud” at the locus that is methylated by  
386 PRC2(41). Xist also has a perfect complement antisense transcript, TsiX(41). In mice, Tsix transcription  
387 promotes PRC2 activity at the Xist promoter, coincident with the formation of Xist:TsiX double-stranded  
388 RNA, to repress Xist expression on the active X chromosome(22,42). In fact, this Xist:TsiX dsRNA does  
389 not inhibit PRC2(17). These RNA matching capabilities may underlie how PRC2 can methylate chromatin  
390 in a cloud of a lncRNA that would otherwise repress methyltransferase activity.

391

392 LncRNA matching may occur with the nascent transcript at the locus where PRC2 activity is promoted.  
393 Although nascent transcription from highly active genes is likely to “win out” by inhibiting PRC2(13,16),  
394 there are multiple pieces of evidence suggesting that PRC2 is active in the presence of nascent transcripts  
395 at lowly-expressed genes. Xist and Kcnq1ot1 lncRNAs are both present with low levels of their antisense  
396 transcript (TsiX and the protein-coding gene Kcnq1, respectively) while PRC2 methylates the chromatin  
397 at these loci(22,43). More-generally, H3K27me3 deposition has been shown to occur in genes with  
398 moderate transcription activity(44-46). Additionally, building up paused RNA Polymerase II with the drug  
399 DRB leads to more accumulation of promoter H3K27me3 than does complete inhibition of transcription  
400 initiation(10). Interestingly, a recent study found that endonucleolytic cleavage of nascent transcripts by a  
401 Polycomb-associated enzyme complex is important for maintaining low expression of Polycomb-  
402 repressed genes, suggesting nascent transcription persists even after PRC2 activity occurs(47). These  
403 results suggest that PRC2 can deal with the inhibitory effects of a nascent transcript to achieve H3K27  
404 methylation. Intermolecular RNA-RNA interactions are one potential mechanism to achieve this. In  
405 addition, recent work has highlighted that once H3K27me3 has been established, this modification can  
406 help further relieve inhibition of methyltransferase activity by RNA(20). Where the mechanisms mentioned  
407 above do not act, other mechanisms must exist to prevent nascent RNAs from inhibiting PRC2, such as  
408 additional RNA binding protein interactions with nascent RNA to mask it. Our findings fit into a model  
409 where the inhibitory effects of RNA on PRC2 catalytic activity can be overcome by specific intermolecular  
410 RNA-RNA interactions to promote de novo H3K27 methylation. This mechanism may operate with multiple  
411 lncRNA pathways in normal contexts and when aberrantly high lncRNA expression occurs in disease,  
412 such as with HOTAIR, that may drive improper PRC2 activity.

413

#### 414 **ACKNOWLEDGMENTS**

415 We thank Kaushik Ragunathan, Srinivas Ramachandran, and members of the Johnson Lab for helpful  
416 comments on the manuscript. We thank Chen Davidovich and Tom Cech for PRC2 baculovirus  
417 constructs.

#### 418 **Funding:**



419 This work was supported by NIH grants R35GM119575 (A.M.J.), R35GM118070 (J.S.K.), and  
420 T32GM008730 and F31CA247343 (J.T.R.); RNA Bioscience Initiative Scholar Awards (M.M.B. and  
421 E.W.H); and an RNA Bioscience Academic Enrichment Award (C.B.) from the University of Colorado  
422 School of Medicine RNA Bioscience Initiative. We thank the University of Colorado Cancer Center  
423 Genomics Core and the Protein Production, Monoclonal Antibody, and Tissue Culture Shared Resource,  
424 both supported by NIH grant P30-CA46934, for technical support.

#### 425 **Author Contributions:**

426 M.M.B and A.M.J conceived the study. M.M.B, E.W.H, C.B, S.K.W performed experiments. M.M.B, E.H.W,  
427 and J.T.R performed bioinformatic analysis. R.B. and A.M.G. designed and purified protein constructs and  
428 provided experimental advice. M.M.B, E.W.H, J.S.K, and A.M.J wrote the manuscript. All authors reviewed  
429 and approved of the manuscript.

430 **Competing Interests:** The authors declare that they have no competing interests.

431 **Data and Materials availability:** All data related to the manuscript are included in main and supplemental  
432 materials. Specific materials generated during this study are available upon request.

433

## 434 **MATERIALS AND METHODS**

### 435 ***In vitro transcription of RNAs***

436 In vitro transcription (IVT) of RNA was performed using the MEGAScript T7 kit (Thermo or Ambion),  
437 reactions were incubated for 4 hours at 37°C. RNA was treated with Turbo DNase for 15 minutes, and  
438 RNA was purified with the RNeasy kit (QIAGEN) 6% Urea polyacrylamide gel or and visualized by agarose  
439 bleach gel.

440

### 441 ***In vitro RNA pulldown experiments***

442 15 nM of IVT 10X MS2 tagged RNA (Full-length HOTAIR or Anti-Luc) was rotated (end-over-end) at room  
443 temperature for 15 minutes with 80 nM of recombinant hnRNP B1 or A2 in EMB 300 Buffer (10 mM Hepes  
444 pH 7.9, 300 mM NaCl, 3 mM MgCl<sub>2</sub>, 0.5% NP-40, 10% Glycerol, 0.1 mM PMSF, 0.5 DTT), RNase inhibitor  
445 (NEB) and 20 ug of competitor yeast tRNA (Roche) in a total volume of 300 µL per sample. At the same

446 time, 300 nM MS2-MBP was prebound to 20  $\mu$ L of amylose resin (NEB) in EMB 300 Buffer, RNase  
447 inhibitor (NEB) and 1% BSA, and rotated at room temperature for 15 minutes. The MS2-MBP amylose  
448 resin was then added to each IVT-hnRNP sample and incubated an additional 15 minutes rotating at room  
449 temperature. Resin was washed 4X in 800  $\mu$ L EMB 300 Buffer and then protein association was analyzed  
450 by Western blot using antibody for hnRNP A2/B1 (Abcam #ab6102). Additionally, 10% of each sample  
451 was used for RNA analysis, where RNA was isolated by phenol/chloroform extraction, purified by ethanol  
452 precipitation, and quantified by RT-qPCR.

453

#### 454 ***Purification of PRC2 complex using Baculovirus expression system***

455 Human PRC2 was purified essentially as described(13), using individual pFastBac1 constructs of EZH2,  
456 SUZ12, EED, RBBP4, and AEBP2 with HMBP-PrS (6XHis, MBP, and PreScission Protease sequences)  
457 N-terminal tags (courtesy of C. Davidovich and T. Cech). Briefly, equal MOI of each viral construct was  
458 used to infect Sf9 cells for 72 hours at 27°C. Cells were harvested in PBS and snap frozen. Cells were  
459 thawed and resuspended in Lysis Buffer (10 mM Tris-HCl pH 7.5, 250 mM NaCl, 0.5% NP-40, 1 mM  
460 TCEP, 1X Complete Protease Inhibitor (Roche)), 20 mL per 500 mL culture, and slowly rocked for 30  
461 minutes at 4°C. All further steps done at 4°C, but never on ice. Lysate was clarified at 29,000 RCF for 30  
462 minutes. Supernatant was incubated with 0.75 mL amylose resin (NEB) for 2 hours. Sample was poured  
463 into a column and resin was washed with 8 mL Lysis Buffer, 12 mL Wash Buffer 1 (10 mM Tris-HCl pH  
464 7.5, 500 mM NaCl, 1 mM TCEP), 12 mL Wash Buffer 2 (10 mM Tris-HCl pH 7.5, 150 mM NaCl, 1 mM  
465 TCEP). Protein was eluted with Wash Buffer 2 + 10 mM maltose. 0.5 mL fractions were collected until  
466 minimal protein was detected. Protein was concentrated ~10-fold. Sample was incubated with PreScission  
467 Protease (GE Healthcare) overnight. Full PRC2 complex was separated by size-exclusion  
468 chromatography on a 24 mL Superose 6 column (GE Healthcare) in 10 mM Tris-HCl pH 7.5, 250 mM  
469 NaCl, 1 mM TCEP. Five-subunit complex containing fractions were concentrated, glycerol was added to  
470 10%, and sample was aliquoted and flash-frozen.

471

#### 472 ***Recombinant protein purification in E. coli***

473 Human hnRNP B1 (~37.4 kDa), A2 (~36 kDa), and B1 truncations were performed as previously  
474 described(23). Human GST-JARID2 (119-574) was expressed in BL21 (DE3) CodonPlus E. coli cells  
475 overnight at 18°C. Cells were lysed on ice using 2 mg/mL lysozyme and sonication in PBS (500 mM NaCl  
476 total), 1 mM EDTA, 1 mM EGTA, 1 mM PMSF, 0.5% Triton-X 100, 15 mM DTT. Sample was spun at  
477 29,000 RCF at 4°C and supernatant was incubated with rocking with Pierce Glutathione Agarose Resin  
478 (Thermo Fisher) for 2-3 hours. Resin was washed with at least 20 times volume of PBS (350 mM NaCl  
479 total), 1 mM EDTA, 1 mM EGTA, 0.1 mM PMSF, 0.5% Triton-X 100, 0.1 mM DTT. Protein was eluted in  
480 50 mM Tris-HCl pH 8.0, 350 mM NaCl, 1 mM DTT, 10 mM glutathione. Sample was dialyzed in 50 mM  
481 Tris-HCl pH 8.0, 350 mM NaCl, 1 mM DTT, 5% glycerol, aliquoted and flash frozen.

482

### 483 ***In vitro RNA-RNA interaction assays***

484 Performed as previously described(23) using 125 nM RAT-tagged JAM2 RNA fragment (IVT from gBlock,  
485 IDT) incubated with 5 nM IVT versions of full-length HOTAIR, HOTAIR with the JAM2 site deleted,  
486 HOTAIR with the JAM2 site mutated (to its complement base), or control RNA Anti-luciferase (anti-sense  
487 to the luciferase mRNA) at equal amounts by nanogram (UV quantification). Protein additions included 50  
488 nM recombinant hnRNP B1, hnRNP A2 and 500 nM PP7-protein A fusion protein purified from E. coli.  
489 The PP7 fusion protein is required to pulldown RAT-tagged RNA with IgG conjugated Dynabeads, with  
490 minimal RNA recovery of both tagged and untagged RNA in the absence of the PP7 fusion protein  
491 (Supplementary Fig. S1A) with B1 binding contingent on JAM2 (Supplementary Fig. S1B).

492

### 493 ***RNA quantification by qRT-PCR***

494 Reverse transcription was performed using the cDNA High Capacity Kit (Life Technologies). Standard  
495 curves using IVT JAM2, HOTAIR or Anti-luciferase were used to calculate amounts of RNA recovered.  
496 RNA inputs for experiments and standard curve samples were tested for integrity by agarose or  
497 acrylamide gel. RT-qPCR was performed using Sybr Green master mix (Takyon), with two qPCR  
498 replicates performed for each sample. Technical replicates were averaged prior to analysis of biological  
499 replicates.

500

501 **In vitro eCLIP-seq**

502 In vitro eCLIP-seq was performed as previously described(24). 1.78 pmol HOTAIR RNA and 8.9 or 17.8  
503 pmol recombinant hnRNP B1 (see (23) for sequence details) were incubated in in 100  $\mu$ L RNA refolding  
504 buffer (20 mM HEPES-KOH pH 7.9, 100 mM KCl, 3 mM MgCl<sub>2</sub>, 0.2 EDTA pH 8.0. 20% Glycerol, 0.5 mM  
505 PMSF, 0.5 DTT) for 20 minutes at room temperature. The mixture was diluted to 250  $\mu$ L in refolding buffer  
506 and UV-crosslinked twice in one well of a 24-well plate at 250 mJ and 254 nm wavelength, with mixing by  
507 pipette in between. B1-RNA crosslinked samples were treated with 0.1 ng RNase A for 4 minutes at 37°C  
508 and 1200 rpm mixing, then stopped with 200 U Murine RNase Inhibitor (NEB). Following this, the in vitro  
509 samples were subjected to end repair, adaptor ligation, SDS-PAGE and transfer to nitrocellulose, and the  
510 remainder of the eCLIP-seq protocol, then sequenced multiplexed with other eCLIP-seq libraries as  
511 previously described(24). PCR products from different cycle number were analyzed by gel to avoid over-  
512 amplification (Supplementary Figure S1C). Control samples HOTAIR-B1 non-crosslinked, B1-RRMs  
513 crosslinked, and HOTAIR only (without gel and transfer steps) were included (Supplementary Figure  
514 S1D,E).

515

516 **Chemical probing and analysis**

517 Chemical probing procedure was similar to(28,36). Specifically, 20 pmol in vitro transcribed and purified  
518 HOTAIR RNA was incubated in 500  $\mu$ L reactions with equimolar amounts of JAM2 RNA, hnRNP B1 or  
519 both in RNA refolding buffer (50 mM HEPES pH 7.4, 200 mM KCl, 5 mM MgCl<sub>2</sub>, 0.1 mM EDTA) at room  
520 temperature for 20 minutes, then divided into two tubes, each containing 245  $\mu$ L. The reaction was started  
521 by addition of 544 nmol 1M7 (+) (1-methyl-7-nitroisatoic anhydride), or of an equal amount of pure DMSO  
522 as a control (-). Samples were incubated for 5 min at 37°C and reactions were quenched with 5  $\mu$ L 0.5M  
523 MES-NaOH. Samples with the JAM2 RNA underwent a JAM2 removal step where they were incubated  
524 with a JAM2 DNA complement oligo, heated at 94°C for 3 minutes to denature RNA and slow cool at room

525 temperature for 10 minutes. All chemically modified RNA was purified using Trizol extraction + isopropanol  
526 precipitation and reverse transcribed using 0.2  $\mu$ M RNA with SuperScript III reverse transcriptase  
527 (Thermo) at 48°C for 1 hour using a fluorescently labeled primer (IDT): 5'-/5-6FAM/. Labeled DNA  
528 products were eluted in HiDi formamide spiked Gene Scan ROX 1000 size standard (Thermo). Samples  
529 were run on an Applied Biosystems 3500 XL capillary electrophoresis system and the data was analyzed  
530 using HiTRACE RiboKit(32-36) with MatLab (Math Works).

531

532 The HiTRACE normalized data, error, and replicate experiments ( $n \geq 3$ ) are contained in Supporting File  
533 SF1. The HiTRACE normalized data for each condition were subsequently normalized using published  
534 methods to better compare each condition on the same scale to prevent extremely reactive positions from  
535 dominating the data analysis(37). Specifically, outlier positions within the data were temporarily excluded  
536 from the data and the remaining top 10% of the data were used to calculate a mean reactivity value used  
537 to normalize the data. The highly reactive data points were included in the data but represent extremely  
538 reactive positions. The inter-quartile range for each experiment was then multiplied by a constant of 6  
539 (empirically chosen) where 6 times the IQR is considered an extremely reactive position. The error  
540 generated from the original HiTRACE analysis was carried through this normalization by converting the  
541 error from the HiTRACE analysis to percent error. The percent error for each nucleotide position was then  
542 multiplied by the normalized value reproducing the error for all positions in each experiment. The  
543 normalized values and corresponding error used for further analysis can be found in Supporting File SF2.  
544 Difference mapping of the data was completed by subtracting the HOTAIR only mean normalized data  
545 from the experimental mean normalized data. The mean-normalized and difference data are represented  
546 in heatmap form using Morpheus (<https://software.broadinstitute.org/morpheus/>) and the raw values are  
547 reported in Supporting File SF3.

548

549 To determine a region of change, the absolute value of the difference data was smoothed by using a  
550 sliding-window-mean for every 3 nucleotide positions along the region of interest. A threshold value was

551 determined by calculating the mean of the smoothed data from normalized PolyA control data minus the  
552 HOTAIR only data. The absolute-mean value and standard deviation were calculated to be 0.067 and  
553 0.049, respectively. A threshold value of 0.17 would represent the mean reactivity value plus two times  
554 the standard deviation and was subsequently applied to the HOTAIR + JAM2 experiments. A threshold  
555 value of 0.32 was generated using the same procedure for the BSA control experiments (mean = 0.12,  
556 std = 0.1) and applied to HOTAIR + B1 and HOTAIR + B1 +JAM2 experiments. The regions of change  
557 were defined as 5 consecutive nucleotides (JAM2 alone) or 4 consecutive nucleotides (B1 and JAM2/B1)  
558 above the threshold value where two consecutive flanking positions had values below the threshold value.  
559 The regions of change are located in Supporting File SF4. The identified regions of change were then  
560 displayed back onto the secondary structural model for HOTAIR (Fig. 4B-E). All mathematical treatments  
561 for the normalized data, data subtractions for difference data, and defining the regions of change were  
562 performed using python in Jupyter Notebook. Graphs for the correlation plots of HOTAIR with the control  
563 data (BSA and PolyA) and experimental samples (JAM2, B1, and JAM2 + B1) in Supplementary Fig. S4  
564 and graphs for the normalized reactivity with error shading (Fig. S3) were generated using python in  
565 Jupyter Notebook.

566

567 Replicate information for each experiment: HOTAIR only (4 replicates); HOTAIR with PolyA control (4  
568 replicates); HOTAIR with BSA control (3 replicates); HOTAIR with JAM2 experiment (5 replicates);  
569 HOTAIR with hnRNP B1 experiment (3 replicates); HOTAIR with JAM2 and B1 experiment (4  
570 replicates).

571

572

### 573 ***RNA-RNA interaction analysis of genome-wide PRC2 targets***

574 Using a previously published database of computationally predicted interactions between human lncRNAs  
575 and the entire transcriptome(25), a list of 40,740 annotated mature transcripts and computational  
576 predictions for RNA-RNA interaction with HOTAIR were analyzed. This list was sorted by the predicted  
577 minimum free energy found among the interactions contained within each pair of RNA sequences. We

578 compared the HOTAIR RNA-RNA interaction list with previously published HOTAIR-dependent PRC2  
579 targets in MDA-MB-231 breast cancer cells identified by CHIP-seq(23,38), a combined list of 885 genes  
580 from multiple groups. Histograms displayed as a fraction of the total identified for each list were plotted  
581 together relative to predicted minimum free energy and a t test was performed comparing the two  
582 distributions.

583

#### 584 ***Nucleosome reconstitution***

585 Di-nucleosomes were assembled using salt dialysis, as previously described(48). To generate a DNA  
586 template for chromatin reconstitution, a 343-bp PCR product consisting of 2x 601 positioning sequences  
587 separated by 40 bp of linker sequence was cloned into pUC57 vector backbone. PCR product was purified  
588 using Nucleospin DNA purification kit (Macherey-Nagel). Chromatin was reconstituted by salt dialysis:  
589 DNA template and human core histones were dialyzed 18-24 hours at 4°C from Hi salt buffer (10 mM Tris-  
590 HCl pH 7.6, 2M NaCl, 1 mM EDTA, 0.05% NP-40, 5 mM BME) to Lo salt buffer (10 mM Tris-HCl pH 7.6,  
591 50 mM NaCl, 1 mM EDTA, 0.05% NP-40, 5 mM BME). Chromatin was dialyzed for an additional 1 hour  
592 in Lo salt buffer and concentrated using Ultra-4 10K Centrifugal Filter Device (Amicon) and stored at 4°C  
593 for no longer than one month.

594

#### 595 ***RNA annealing***

596 RNA pre-annealing was performed by heating RNA at 94°C for 4 minutes in annealing buffer (6 mM  
597 HEPES pH 7.5, 60 mM KCl, 1 mM MgCl<sub>2</sub>), then slow cooling on bench for 40 minutes followed by placing  
598 samples on ice.

599

#### 600 ***Histone methyltransferase assays***

601 HMTase assays were performed in a total volume of 15 µl containing HMTase buffer (10 mM HEPES, pH  
602 7.5, 2.5 mM MgCl<sub>2</sub>, 0.25 mM EDTA, 4% Glycerol and 0.1 mM DTT) with 75 µM S-Adenosylmethionine  
603 (SAM, NEB), varying amounts ssRNA and duplex RNA (see above), 600 nM JARID2, 360 nM of  
604 dinucleosomes, and 600-660 nM recombinant human PRC2 complexes under the following conditions.

605 The reaction mixture was incubated for 30 minutes at 30°C and stopped by adding 12 µl of Laemmli  
606 sample buffer (Biorad). After HMT reactions, samples were incubated for 5 minutes at 95°C and separated  
607 on SDS-PAGE gels. Gels were then subjected to wet transfer (30% MeOH transfer buffer) of histones to  
608 0.22 µm PVDF membranes (Millipore) and protein was detected by Western blot analysis using primary  
609 αRb H3K27me3 antibody (Millipore #07-449), secondary antibody (Biorad #170-6515), H3-HRP (Abcam  
610 #ab21054). Similar experiments were performed, except that the total ribonucleotide concentrations of all  
611 RNAs used were kept constant (Supplementary Fig. S2).

612

## 613 REFERENCES

614

- 615 1. Bonasio, R., and Shiekhatar, R. (2014) Regulation of transcription by long noncoding RNAs. *Annu*  
616 *Rev Genet* **48**, 433-455
- 617 2. Wu, S. K., Roberts, J. T., Balas, M. M., and Johnson, A. M. (2020) RNA matchmaking in chromatin  
618 regulation. *Biochem Soc Trans.* DOI 10.1042/BST20191225. *In press*.
- 619 3. Loda, A., and Heard, E. (2019) Xist RNA in action: Past, present, and future. *PLoS Genet* **15**,  
620 e1008333
- 621 4. Rinn, J. L., Kertesz, M., Wang, J. K., Squazzo, S. L., Xu, X., Bruggmann, S. A., Goodnough, L. H.,  
622 Helms, J. A., Farnham, P. J., Segal, E., and Chang, H. Y. (2007) Functional demarcation of active  
623 and silent chromatin domains in human HOX loci by noncoding RNAs. *Cell* **129**, 1311-1323
- 624 5. Yu, J. R., Lee, C. H., Oksuz, O., Stafford, J. M., and Reinberg, D. (2019) PRC2 is high  
625 maintenance. *Genes Dev* **33**, 903-935
- 626 6. Brockdorff, N. (2013) Noncoding RNA and Polycomb recruitment. *RNA* **19**, 429-442
- 627 7. Almeida, M., Bowness, J. S., and Brockdorff, N. (2020) The many faces of Polycomb regulation  
628 by RNA. *Curr Opin Genet Dev* **61**, 53-61
- 629 8. Zyllicz, J. J., Bousard, A., Zumer, K., Dossin, F., Mohammad, E., da Rocha, S. T., Schwalb, B.,  
630 Syx, L., Dingli, F., Loew, D., Cramer, P., and Heard, E. (2019) The Implication of Early Chromatin  
631 Changes in X Chromosome Inactivation. *Cell* **176**, 182-197 e123
- 632 9. Portoso, M., Ragazzini, R., Brencic, Z., Moiani, A., Michaud, A., Vassilev, I., Wassef, M., Servant,  
633 N., Sargueil, B., and Margueron, R. (2017) PRC2 is dispensable for HOTAIR-mediated  
634 transcriptional repression. *EMBO J*
- 635 10. Riising, E. M., Comet, I., Leblanc, B., Wu, X., Johansen, J. V., and Helin, K. (2014) Gene silencing  
636 triggers polycomb repressive complex 2 recruitment to CpG islands genome wide. *Mol Cell* **55**,  
637 347-360



- 638 11. Wang, X., Goodrich, K. J., Gooding, A. R., Naeem, H., Archer, S., Paucek, R. D., Youmans, D. T.,  
639 Cech, T. R., and Davidovich, C. (2017) Targeting of Polycomb Repressive Complex 2 to RNA by  
640 Short Repeats of Consecutive Guanines. *Mol Cell* **65**, 1056-1067 e1055
- 641 12. Beltran, M., Tavares, M., Justin, N., Khandelwal, G., Ambrose, J., Foster, B. M., Worlock, K. B.,  
642 Tvardovskiy, A., Kunzelmann, S., Herrero, J., Bartke, T., Gamblin, S. J., Wilson, J. R., and Jenner,  
643 R. G. (2019) G-tract RNA removes Polycomb repressive complex 2 from genes. *Nat Struct Mol*  
644 *Biol* **26**, 899-909
- 645 13. Davidovich, C., Zheng, L., Goodrich, K. J., and Cech, T. R. (2013) Promiscuous RNA binding by  
646 Polycomb repressive complex 2. *Nat Struct Mol Biol* **20**, 1250-1257
- 647 14. Kaneko, S., Son, J., Shen, S. S., Reinberg, D., and Bonasio, R. (2013) PRC2 binds active  
648 promoters and contacts nascent RNAs in embryonic stem cells. *Nat Struct Mol Biol* **20**, 1258-1264
- 649 15. Wang, X., Paucek, R. D., Gooding, A. R., Brown, Z. Z., Ge, E. J., Muir, T. W., and Cech, T. R.  
650 (2017) Molecular analysis of PRC2 recruitment to DNA in chromatin and its inhibition by RNA. *Nat*  
651 *Struct Mol Biol* **24**, 1028-1038
- 652 16. Kaneko, S., Son, J., Bonasio, R., Shen, S. S., and Reinberg, D. (2014) Nascent RNA interaction  
653 keeps PRC2 activity poised and in check. *Genes Dev* **28**, 1983-1988
- 654 17. Cifuentes-Rojas, C., Hernandez, A. J., Sarma, K., and Lee, J. T. (2014) Regulatory interactions  
655 between RNA and polycomb repressive complex 2. *Mol Cell* **55**, 171-185
- 656 18. Beltran, M., Yates, C. M., Skalska, L., Dawson, M., Reis, F. P., Viiri, K., Fisher, C. L., Sibley, C.  
657 R., Foster, B. M., Bartke, T., Ule, J., and Jenner, R. G. (2016) The interaction of PRC2 with RNA  
658 or chromatin is mutually antagonistic. *Genome Res* **26**, 896-907
- 659 19. Davidovich, C., Wang, X., Cifuentes-Rojas, C., Goodrich, K. J., Gooding, A. R., Lee, J. T., and  
660 Cech, T. R. (2015) Toward a consensus on the binding specificity and promiscuity of PRC2 for  
661 RNA. *Mol Cell* **57**, 552-558
- 662 20. Zhang, Q., McKenzie, N. J., Warneford-Thomson, R., Gail, E. H., Flanigan, S. F., Owen, B. M.,  
663 Lauman, R., Levina, V., Garcia, B. A., Schittenhelm, R. B., Bonasio, R., and Davidovich, C. (2019)  
664 RNA exploits an exposed regulatory site to inhibit the enzymatic activity of PRC2. *Nat Struct Mol*  
665 *Biol* **26**, 237-247
- 666 21. Voigt, P., Leroy, G., Drury, W. J., 3rd, Zee, B. M., Son, J., Beck, D. B., Young, N. L., Garcia, B. A.,  
667 and Reinberg, D. (2012) Asymmetrically modified nucleosomes. *Cell* **151**, 181-193
- 668 22. Ogawa, Y., Sun, B. K., and Lee, J. T. (2008) Intersection of the RNA interference and X-inactivation  
669 pathways. *Science* **320**, 1336-1341
- 670 23. Meredith, E. K., Balas, M. M., Sindy, K., Haislop, K., and Johnson, A. M. (2016) An RNA  
671 matchmaker protein regulates the activity of the long noncoding RNA HOTAIR. *RNA* **22**, 995-1010
- 672 24. Nguyen, E. D., Balas, M. M., Griffin, A. M., Roberts, J. T., and Johnson, A. M. (2018) Global  
673 profiling of hnRNP A2/B1-RNA binding on chromatin highlights LncRNA interactions. *RNA Biol*, 1-  
674 13
- 675 25. Terai, G., Iwakiri, J., Kameda, T., Hamada, M., and Asai, K. (2016) Comprehensive prediction of  
676 lncRNA-RNA interactions in human transcriptome. *BMC Genomics* **17 Suppl 1**, 12

- 677 26. Nepal, C., Taranta, A., Hadzhiev, Y., Pundhir, S., Mydel, P., Lenhard, B., Muller, F., and Andersen,  
678 J. B. (2020) Ancestrally Duplicated Conserved Noncoding Element Suggests Dual Regulatory  
679 Roles of HOTAIR in cis and trans. *iScience* **23**, 101008
- 680 27. Wu, B., Su, S., Patil, D. P., Liu, H., Gan, J., Jaffrey, S. R., and Ma, J. (2018) Molecular basis for  
681 the specific and multivalent recognitions of RNA substrates by human hnRNP A2/B1. *Nat*  
682 *Commun* **9**, 420
- 683 28. Somarowthu, S., Legiewicz, M., Chillon, I., Marcia, M., Liu, F., and Pyle, A. M. (2015) HOTAIR  
684 forms an intricate and modular secondary structure. *Mol Cell* **58**, 353-361
- 685 29. Smola, M. J., Christy, T. W., Inoue, K., Nicholson, C. O., Friedersdorf, M., Keene, J. D., Lee, D.  
686 M., Calabrese, J. M., and Weeks, K. M. (2016) SHAPE reveals transcript-wide interactions,  
687 complex structural domains, and protein interactions across the Xist lncRNA in living cells. *Proc*  
688 *Natl Acad Sci U S A* **113**, 10322-10327
- 689 30. Kumar, A., and Wilson, S. H. (1990) Studies of the strand-annealing activity of mammalian hnRNP  
690 complex protein A1. *Biochemistry* **29**, 10717-10722
- 691 31. Mayeda, A., Munroe, S. H., Caceres, J. F., and Krainer, A. R. (1994) Function of conserved  
692 domains of hnRNP A1 and other hnRNP A/B proteins. *EMBO J* **13**, 5483-5495
- 693 32. Lee, S., Kim, H., Tian, S., Lee, T., Yoon, S., and Das, R. (2015) Automated band annotation for  
694 RNA structure probing experiments with numerous capillary electrophoresis profiles.  
695 *Bioinformatics* **31**, 2808-2815
- 696 33. Kladwang, W., Mann, T. H., Becka, A., Tian, S., Kim, H., Yoon, S., and Das, R. (2014)  
697 Standardization of RNA chemical mapping experiments. *Biochemistry* **53**, 3063-3065
- 698 34. Kim, H., Cordero, P., Das, R., and Yoon, S. (2013) HiTRACE-Web: an online tool for robust  
699 analysis of high-throughput capillary electrophoresis. *Nucleic Acids Res* **41**, W492-498
- 700 35. Yoon, S., Kim, J., Hum, J., Kim, H., Park, S., Kladwang, W., and Das, R. (2011) HiTRACE: high-  
701 throughput robust analysis for capillary electrophoresis. *Bioinformatics* **27**, 1798-1805
- 702 36. Hartwick, E. W., Costantino, D. A., MacFadden, A., Nix, J. C., Tian, S., Das, R., and Kieft, J. S.  
703 (2018) Ribosome-induced RNA conformational changes in a viral 3'-UTR sense and regulate  
704 translation levels. *Nat Commun* **9**, 5074
- 705 37. Hajdin, C. E., Bellaousov, S., Huggins, W., Leonard, C. W., Mathews, D. H., and Weeks, K. M.  
706 (2013) Accurate SHAPE-directed RNA secondary structure modeling, including pseudoknots.  
707 *Proc Natl Acad Sci U S A* **110**, 5498-5503
- 708 38. Gupta, R. A., Shah, N., Wang, K. C., Kim, J., Horlings, H. M., Wong, D. J., Tsai, M. C., Hung, T.,  
709 Argani, P., Rinn, J. L., Wang, Y., Brzoska, P., Kong, B., Li, R., West, R. B., van de Vijver, M. J.,  
710 Sukumar, S., and Chang, H. Y. (2010) Long non-coding RNA HOTAIR reprograms chromatin state  
711 to promote cancer metastasis. *Nature* **464**, 1071-1076
- 712 39. Mollie, A., Temirov, J., Lee, J., Coughlin, M., Kanagaraj, A. P., Kim, H. J., Mittag, T., and Taylor,  
713 J. P. (2015) Phase separation by low complexity domains promotes stress granule assembly and  
714 drives pathological fibrillization. *Cell* **163**, 123-133
- 715 40. Sancar, A., and Hearst, J. E. (1993) Molecular matchmakers. *Science* **259**, 1415-1420

- 716 41. Lee, J. T., and Bartolomei, M. S. (2013) X-inactivation, imprinting, and long noncoding RNAs in  
717 health and disease. *Cell* **152**, 1308-1323
- 718 42. Ohhata, T., Hoki, Y., Sasaki, H., and Sado, T. (2008) Crucial role of antisense transcription across  
719 the Xist promoter in Tsix-mediated Xist chromatin modification. *Development* **135**, 227-235
- 720 43. Lewis, A., Mitsuya, K., Umlauf, D., Smith, P., Dean, W., Walter, J., Higgins, M., Feil, R., and Reik,  
721 W. (2004) Imprinting on distal chromosome 7 in the placenta involves repressive histone  
722 methylation independent of DNA methylation. *Nat Genet* **36**, 1291-1295
- 723 44. Young, M. D., Willson, T. A., Wakefield, M. J., Trounson, E., Hilton, D. J., Blewitt, M. E., Oshlack,  
724 A., and Majewski, I. J. (2011) ChIP-seq analysis reveals distinct H3K27me3 profiles that correlate  
725 with transcriptional activity. *Nucleic Acids Res* **39**, 7415-7427
- 726 45. Brookes, E., de Santiago, I., Hebenstreit, D., Morris, K. J., Carroll, T., Xie, S. Q., Stock, J. K.,  
727 Heidemann, M., Eick, D., Nozaki, N., Kimura, H., Ragoussis, J., Teichmann, S. A., and Pombo, A.  
728 (2012) Polycomb associates genome-wide with a specific RNA polymerase II variant, and  
729 regulates metabolic genes in ESCs. *Cell Stem Cell* **10**, 157-170
- 730 46. Wei, C., Xiao, R., Chen, L., Cui, H., Zhou, Y., Xue, Y., Hu, J., Zhou, B., Tsutsui, T., Qiu, J., Li, H.,  
731 Tang, L., and Fu, X. D. (2016) RBFox2 Binds Nascent RNA to Globally Regulate Polycomb  
732 Complex 2 Targeting in Mammalian Genomes. *Mol Cell* **62**, 982
- 733 47. Zhou, H., Shipkovenska, G., Kalocsay, M., Zhang, J., Luo, Z., Gygi, S. P., and Moazed, D. (2019)  
734 An RNA degradation complex required for silencing of Polycomb target genes. *bioRxiv*,  
735 2019.2012.2023.887547
- 736 48. Dyer, P. N., Edayathumangalam, R. S., White, C. L., Bao, Y., Chakravarthy, S., Muthurajan, U.  
737 M., and Luger, K. (2004) Reconstitution of nucleosome core particles from recombinant histones  
738 and DNA. *Methods Enzymol* **375**, 23-44
- 739 49. Wright, P. R., Georg, J., Mann, M., Sorescu, D. A., Richter, A. S., Lott, S., Kleinkauf, R., Hess, W.  
740 R., and Backofen, R. (2014) CopraRNA and IntaRNA: predicting small RNA targets, networks and  
741 interaction domains. *Nucleic Acids Res* **42**, W119-123  
742

743

## 744 **FIGURE LEGENDS**

745 **FIGURE 1. HOTAIR intermolecular interaction is promoted by hnRNP B1. (A)** Model of B1-mediated  
746 HOTAIR RNA-RNA interactions with nascent target RNA leading to PRC2 activity and gene silencing. **(B)**  
747 In vitro RNA pulldown with MS2-tagged HOTAIR or Anti-luc with recombinant B1 or A2. “A2+” is 3x the  
748 concentration of A2. Minus MS2-MBP fusion protein pulldown included to account for background bead  
749 binding. Western blot analysis using A2/B1 antibody. RNA recovery quantified by qPCR (n=3). **(C)** Crystal  
750 structure of RRM domains of A2/B1 in complex with 10 mer RNA (yellow)(27). Two molecules of the  
751 tandem RRMs are shown in purple/green. Blue circles highlight N-terminus. Adapted from (27)

752 <http://creativecommons.org/licenses/by/4.0/>. **(D)** Schematic of RNA-RNA interaction assay: RAT-tagged  
753 JAM2 and HOTAIR IVTs incubated +/- recombinant hnRNP B1. JAM2 tethered by PP7 coat protein on  
754 magnetic beads. Recovery of HOTAIR by JAM2 pulldown quantified by RT-qPCR and protein by Western.  
755 **(E)** Assays from 1D with HOTAIR or Anti-luc RNA +/- hnRNP B1 or A2. (n=6). **(F)** As in 1E with full-length  
756 HOTAIR, HOTAIR with the JAM2 interaction site deleted or mutated +/- hnRNP B1 (n = 3). Error bars in  
757 1E,F represent standard deviations. P-values determined using two-way ANOVA and two-tailed student t  
758 tests.

759

760 **FIGURE 2. Examining hnRNP B1 specific interactions with the lncRNA HOTAIR using in vitro eCLIP**  
761 **mapping. (A)** Schematic of in vitro eCLIP experiments: recombinant B1 incubated with IVT HOTAIR.  
762 HOTAIR-B1 complexes were UV-crosslinked. RNA was fragmented with limited RNase A treatment,  
763 followed by in vitro eCLIP protocol (see Methods and (24)). **(B) (Top)** Mapping of reverse transcription  
764 termination events from HOTAIR-B1 in vitro eCLIP as a measure of direct protein crosslinking (HOTAIR  
765 domains alternately shaded violet). Termination sites normalized to read count with significant peaks  
766 determined by values greater than 5000. **(Bottom)** Zoom in on domain 1 (1-530) for titration experiments  
767 highlights multiple B1 interaction sites (shaded in grey). **(C) (Top)** Diagram of constructs including  
768 construct with all RGGs mutated ("5XRGG MUT") and B1 glycine-rich domain deletion ("ΔGR"). **(Bottom)**  
769 Assays as in 1B with recombinant truncated versions of the constructs depicted above. Western for A2/B1.  
770 Intensities should be compared to input, since the antibody recognizes the constructs differentially. Equal  
771 protein loading for samples demonstrated by Coomassie gel with equal amounts of protein loaded as in  
772 each pulldown. Bar graph of HOTAIR recovery as percent input from each pulldown was quantified by  
773 qPCR (n=2).

774

775 **FIGURE 3. Chemical probing of HOTAIR highlights B1 interactions. (A)** Diagram of the IVT HOTAIR  
776 domain 1 construct for chemical probing experiments. Schematic representation of 1M7 chemical probing  
777 of HOTAIR domain 1 with B1 and/or the JAM2 fragment (54 nt). **(B)** Heatmap of normalized reactivity for

778 HOTAIR only (HA only), HOTAIR + JAM2 (HAJ2), HOTAIR + B1 (HAB1) and HOTAIR + B1 + JAM2  
779 (HAB1J2). White values represent non-reactive nucleotides and red values represent more reactive  
780 nucleotides. **(C)** Line graphs of normalized reactivity for each condition. Light blue shaded boxes highlight  
781 the in vitro B1 eCLIP sites identified. Light red shaded box highlights the RNA-RNA interaction site. **(D)**  
782 Boxplots of normalized reactivity for all nucleotide positions, the JAM2 interaction region (245-306 nt), and  
783 B1 eCLIP-derived binding sites (141-172 nt, 304-314 nt, 460-523 nt). Error bars represent standard  
784 deviations. P-values determined using one-way ANOVA multiple comparison tests between HA only  
785 compared to each variable condition (\*P < 0.01, \*\*P < 0.005, \*\*\*P < 0.0001). **(E)** Bar graphs for normalized  
786 reactivity of HOTAIR only and HOTAIR + B1 at specific eCLIP B1 binding sites, as well as a minimally  
787 changed control region, by nucleotide.

788

789 **FIGURE 4. Establishment of RNA-RNA interactions alters HOTAIR structure.** **(A)** Heatmap of  
790 HOTAIR reactivity changes upon addition of JAM2 ( $\Delta$ J2), hnRNP B1 ( $\Delta$ B1) or both ( $\Delta$ B1J2), compared to  
791 HOTAIR only. Red values become more reactive, white values don't change, and blue values become  
792 less reactive when JAM2, B1 or both are present. **(B)** Prominent regions of change mapped to the HOTAIR  
793 domain 1 secondary structure(28) (with permission) with either JAM2 RNA, **(C)** hnRNP B1 (highlighted in  
794 grey) or **(D,E)** both JAM2+B1 using either control RNA threshold analysis (highlighted in light green) or  
795 control protein threshold analysis (highlighted in light purple). Regions of change were determined as  
796 described in Materials and Methods. In vitro eCLIP B1 binding sites are highlighted in blue and the JAM2  
797 RNA-RNA interaction site is highlighted in green.

798

799 **FIGURE 5. Duplex RNA promotes PRC2 activity.** **(A)** Histograms comparing the predicted minimum  
800 free energy for RNA-RNA interactions between HOTAIR and 40,740 RNAs across the transcriptome  
801 (grey) or between HOTAIR and 885 transcripts from genes that gain PRC2 activity when HOTAIR is  
802 overexpressed in breast cancer cells (red). Data from(23,25,38). **(B)** Native gel of di-nucleosomes  
803 reconstituted via salt dialysis using a DNA template containing two 601 sequences surrounding 40-bp of

804 linker DNA. DNA and nucleosome samples were run on a 5% native polyacrylamide gel and stained with  
805 SYBR Gold. **(C)** Recombinant human PRC2 complex includes SUZ12, EZH2, EED, RBBP4 and AEBP2,  
806 analyzed by SDS-PAGE and stained with Coomassie blue. **(D)** Histone methyltransferase assay (HMTase  
807 assay) was performed with recombinant PRC2 complex, di-nucleosomes, S-Adenosylmethionine (SAM)  
808 with and without the co-factor JARID2 (amino acids 119-574). PRC2 activity was determined by SDS-  
809 PAGE followed by H3K27me3 and total H3 Western blot analysis. **(E)** Native 0.5X TBE gel of RNA  
810 annealing titration with HOTAIR forward and reverse fragments to show formation of dsRNA. HMTase  
811 assay with annealed HOTAIR dsRNA titration analyzed by Western blot.

812

813 **FIGURE 6. HOTAIR matching with target RNA promotes PRC2 activity.** **(A)** Native PAGE of RNA  
814 annealing titration with HOTAIR fragments and either JAM2 or HOXD10 matching RNAs. **(B)** RNA-RNA  
815 interaction between HOTAIR and JAM2 predicted by IntaRNA(49). HMTase assay performed with  
816 recombinant PRC2, di-nucleosomes, HOTAIR fragment (62 nt) and JAM2 match (54 nt) titration. PRC2  
817 activity determined by H3K27me3 and total H3 Western. **(C)** Quantification of 6B (n=3). **(D)** IntaRNA result  
818 of HOTAIR and HOXD10. HMTase as in 6B with HOTAIR fragment (31 nt) HOXD10 match (37 nt) titration.  
819 **(E)** Quantification of 6D (n=5). **(F)** As in 6D, with polyA instead of HOXD10 (n=4). **(G)** HMTase as above  
820 with HOTAIR domain 1 (nucleotides 1-530) and JAM2 match (62 nt) titration. **(H)** Quantification of 6G  
821 (n=3). **(I)** As in 6G, except using HOTAIR with JAM2 match site deleted "HOTAIR D1\_del". **(J)** As in 6G,  
822 except with the addition of hnRNP B1. **(K)** Quantification of 6J (n=3). **(C,E,F,H,I,K)** Percent relief of  
823 inhibition is normalized to H3 signal and relative to no RNA and described as % relief from HOTAIR only  
824 reaction. Error bars represent standard deviations. P-values were determined using unpaired t tests with  
825 a 95% confidence interval.

826

827 **Figure 7. Model for HOTAIR-mediated chromatin silencing via intermolecular RNA-RNA**  
828 **interactions.** Binding of PRC2 to single-stranded regions of HOTAIR inhibits enzymatic activity. B1  
829 promotes RNA-RNA matching of HOTAIR with target nascent RNA via bridging of the RNAs and

830 conformational changes in the lncRNA to promote intermolecular base-pairing. B1 dissociates from the  
831 RNAs, promoting a conformation that may reduce PRC2 affinity for those RNAs through formation of the  
832 dsRNA match, thereby increasing PRC2 interaction with chromatin, leading to H3K27me3 and  
833 transcriptional repression.

834

Figure 1

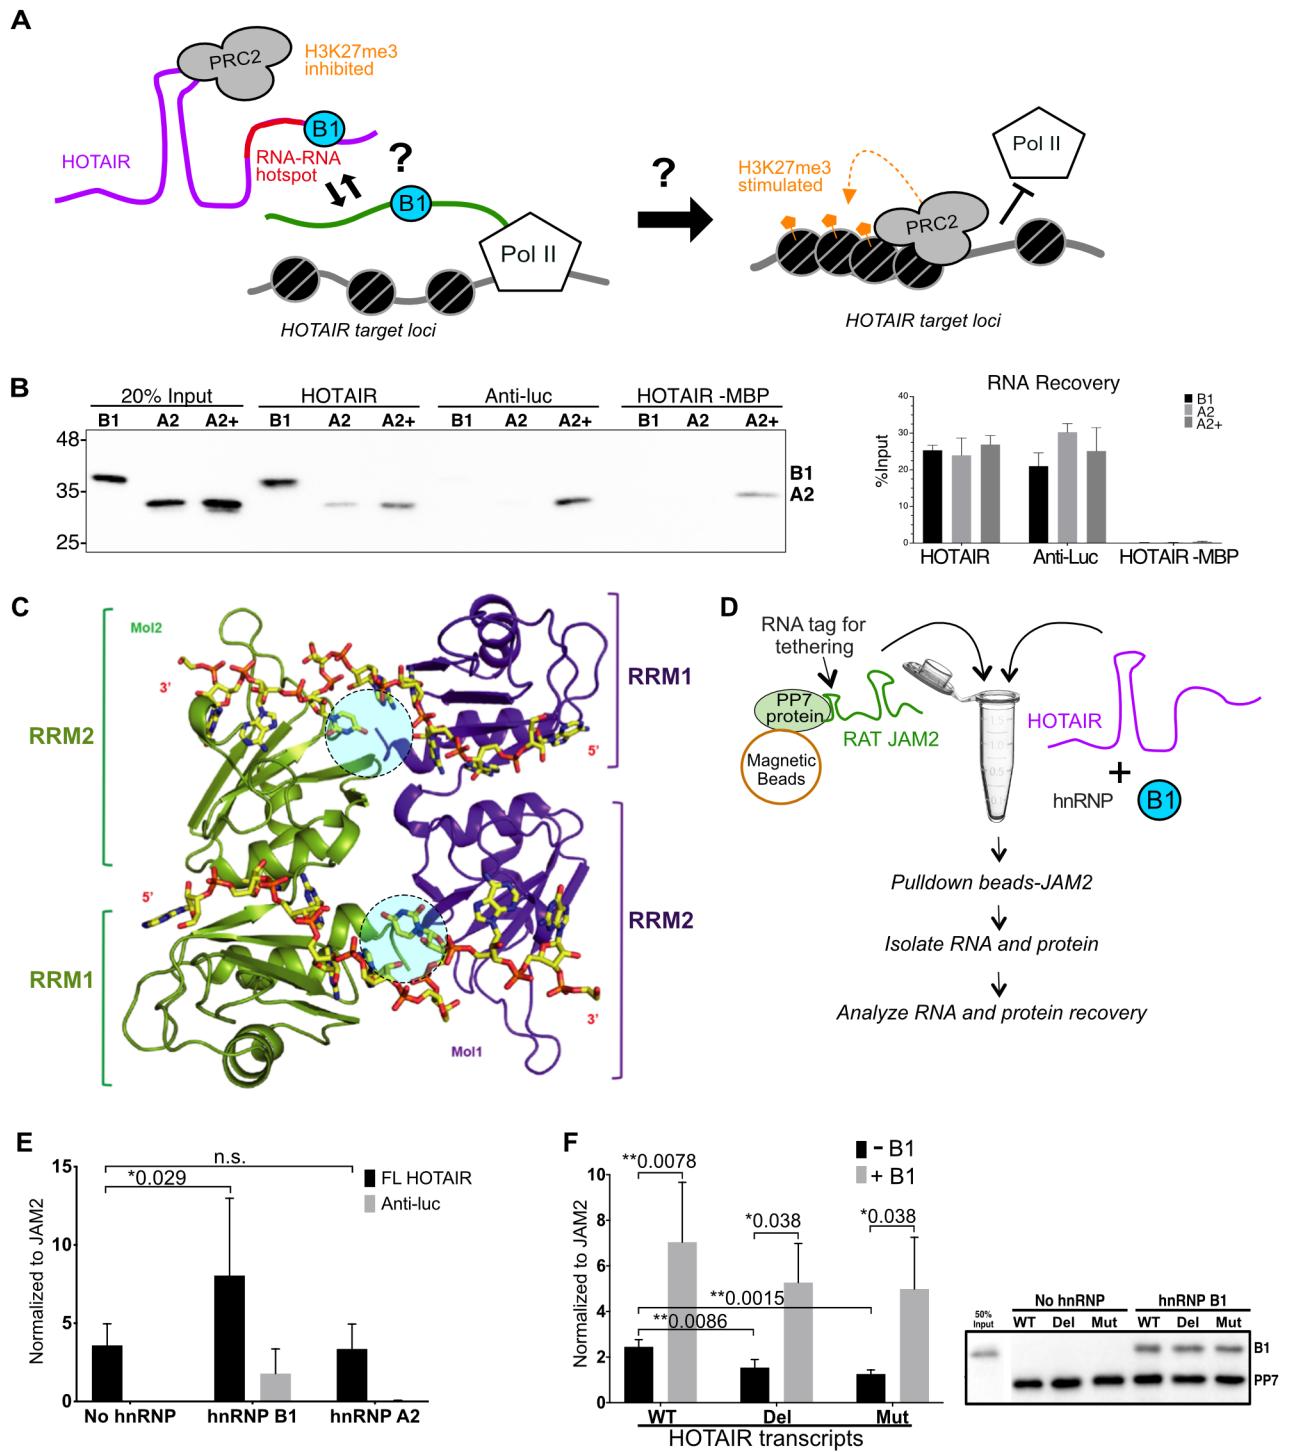



## Figure 2

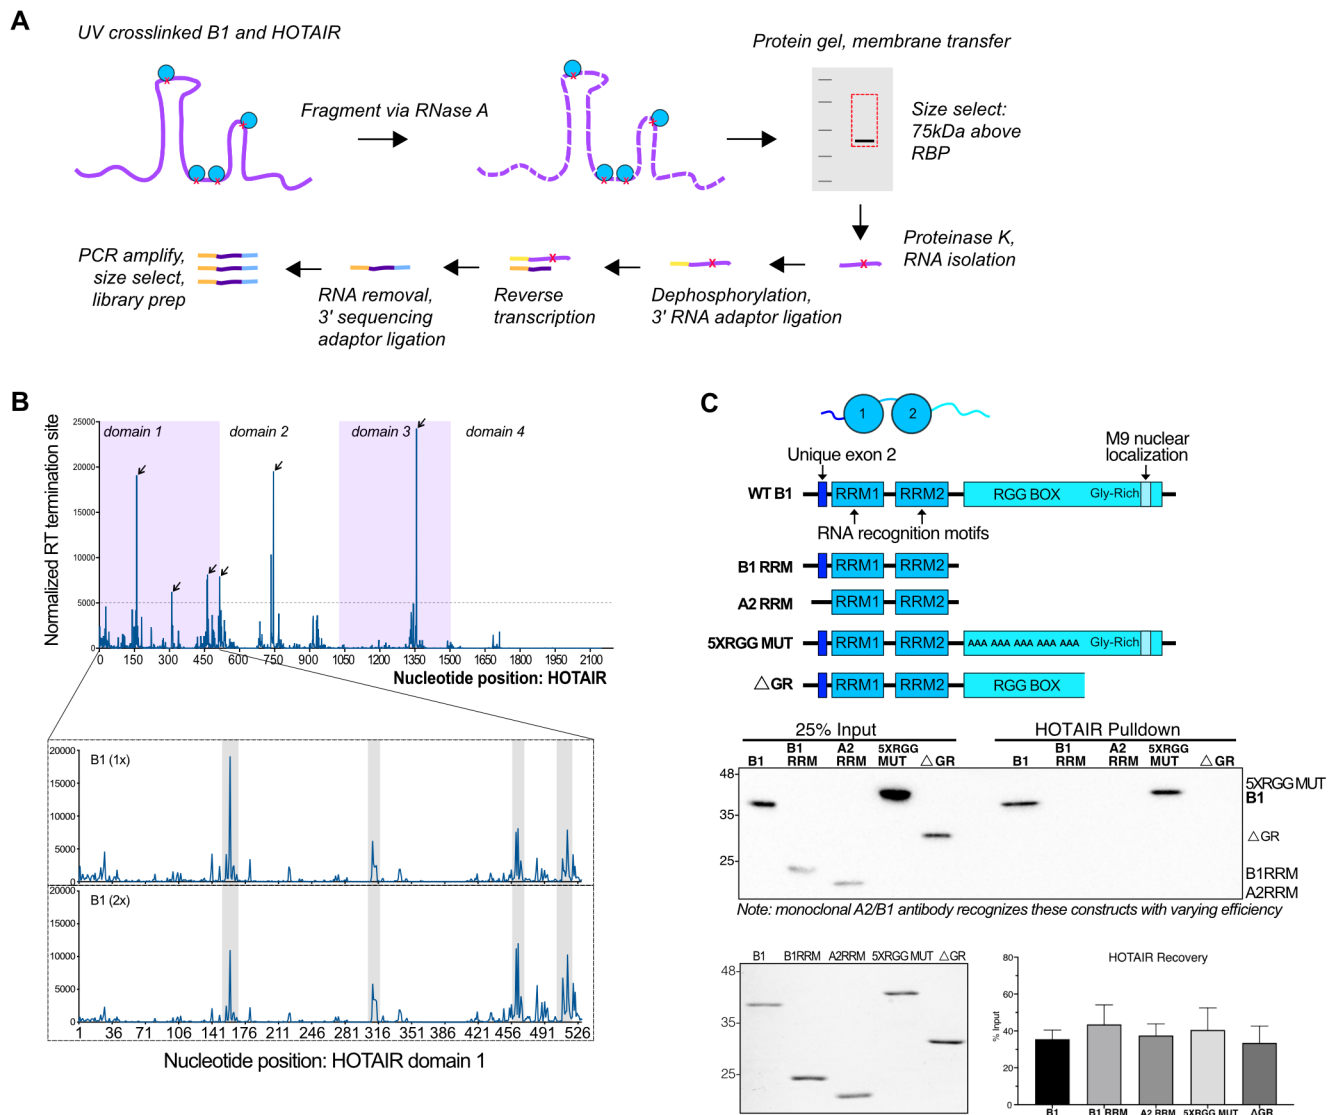

**Figure 3**

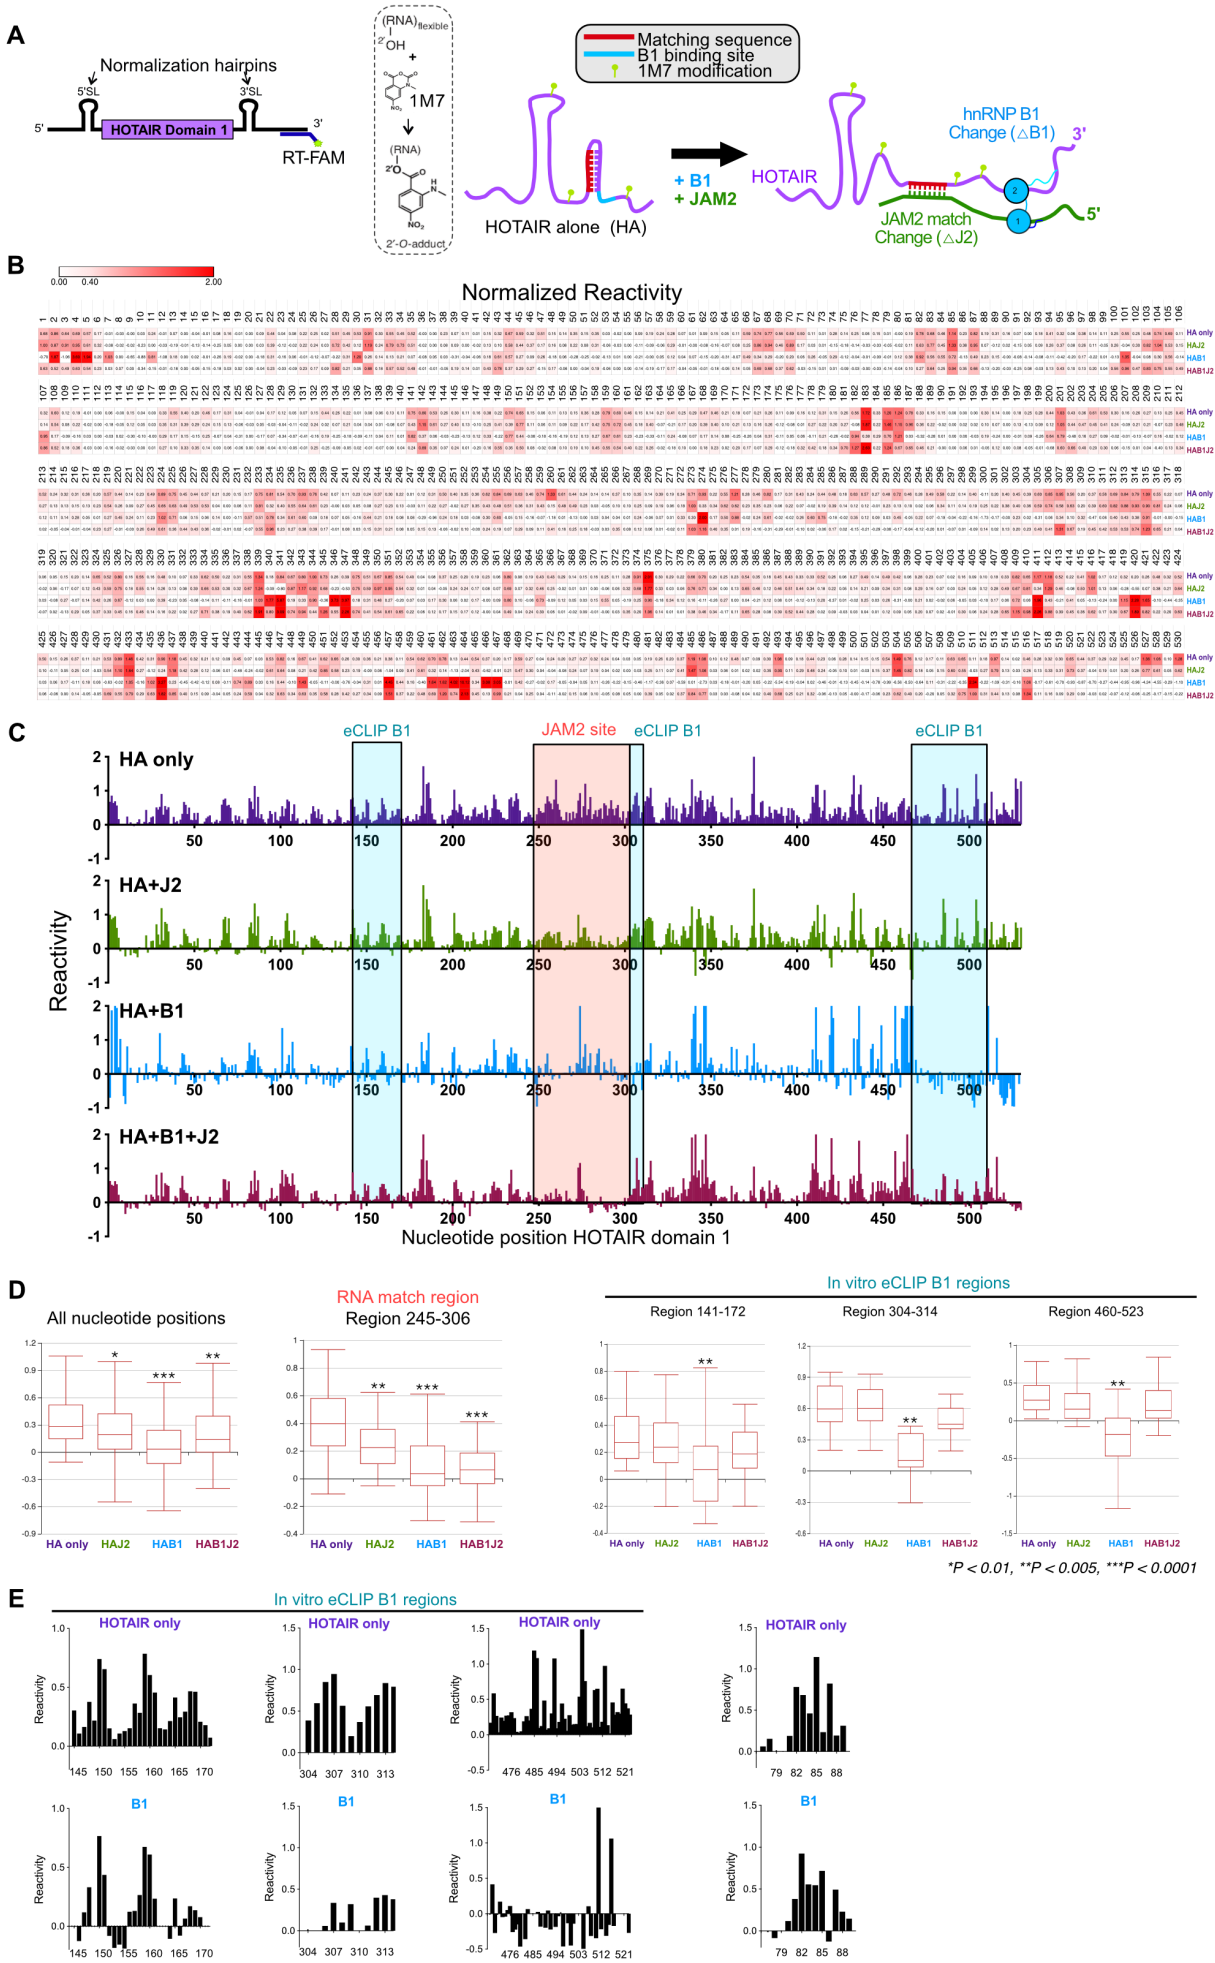

Figure 4

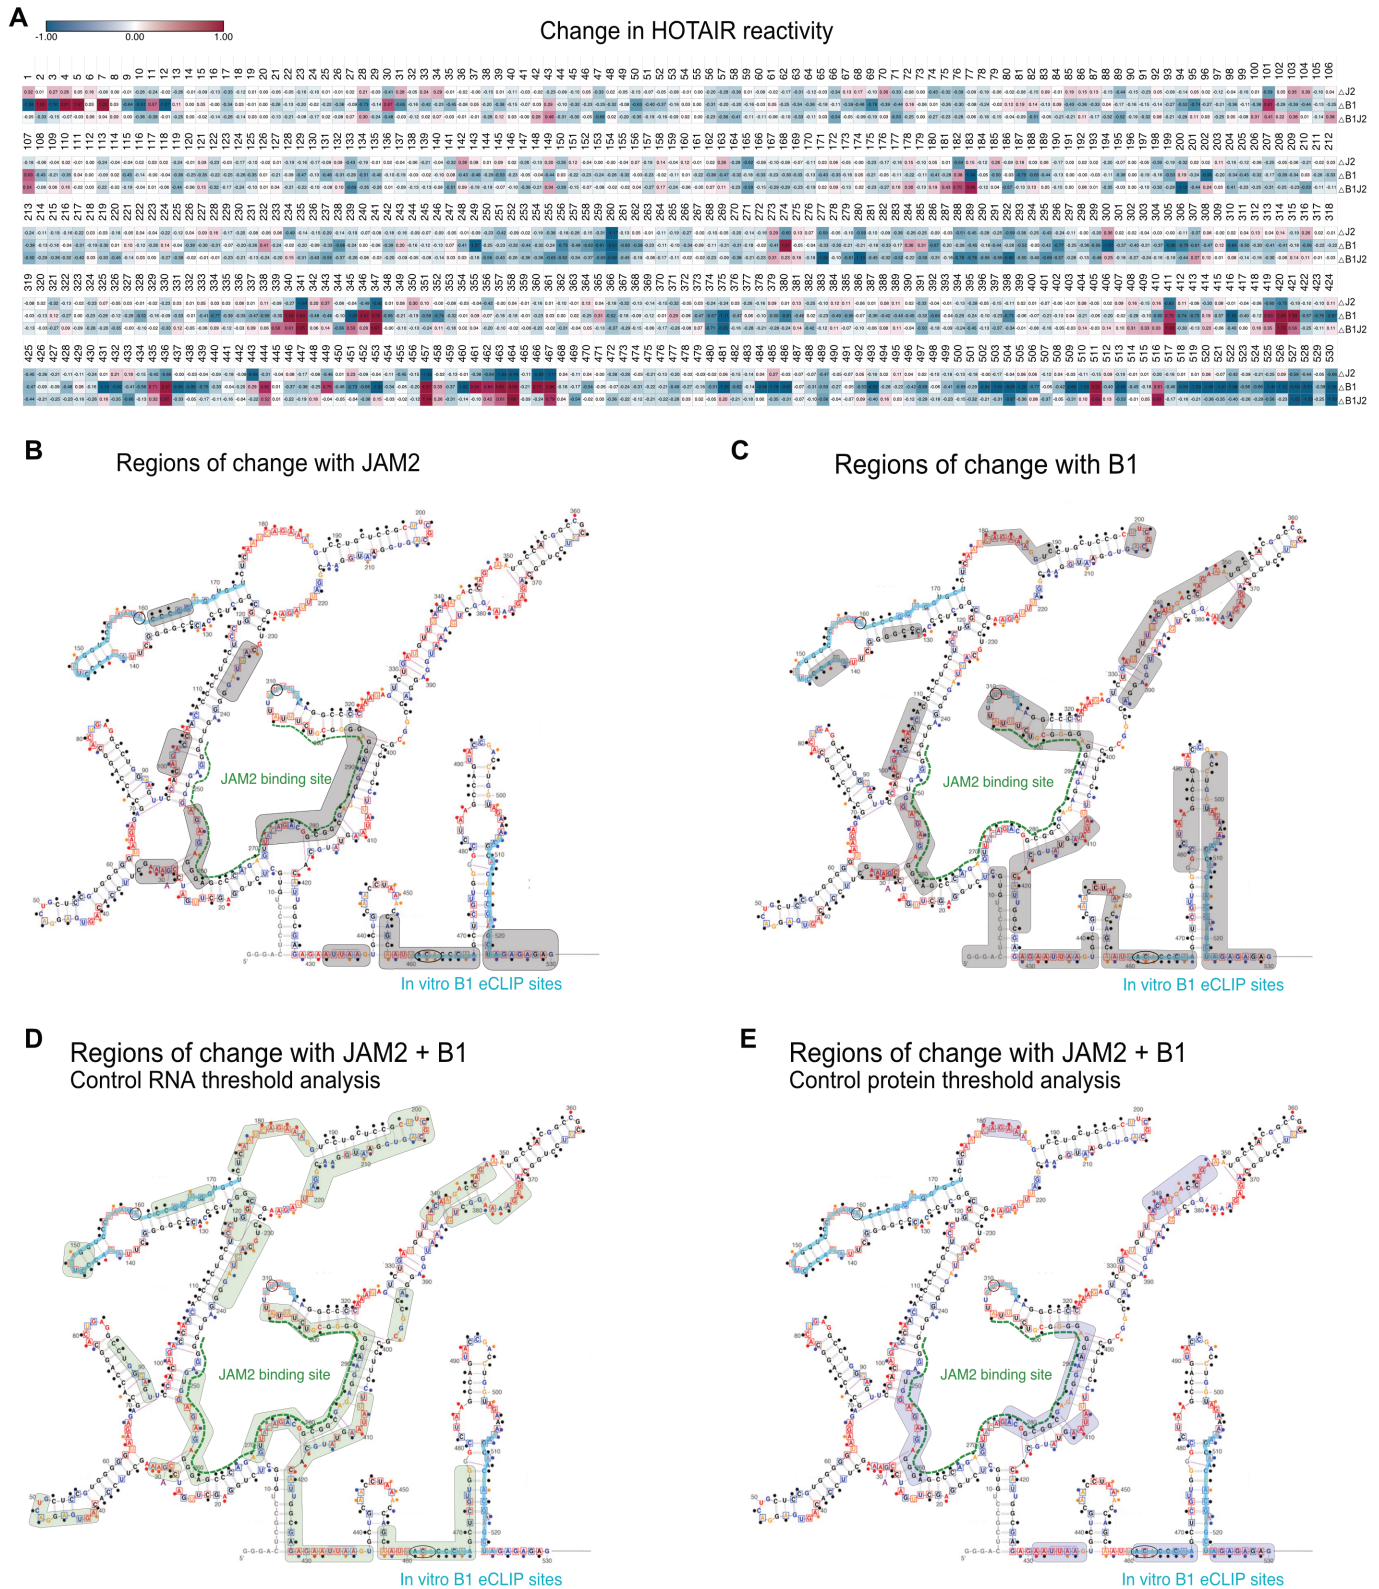

Figure 5

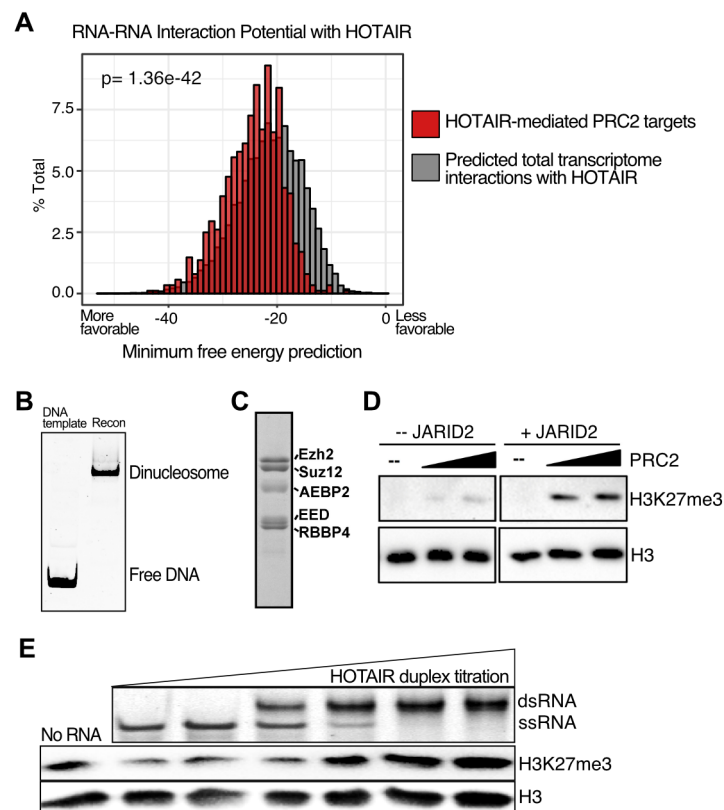

Figure 6

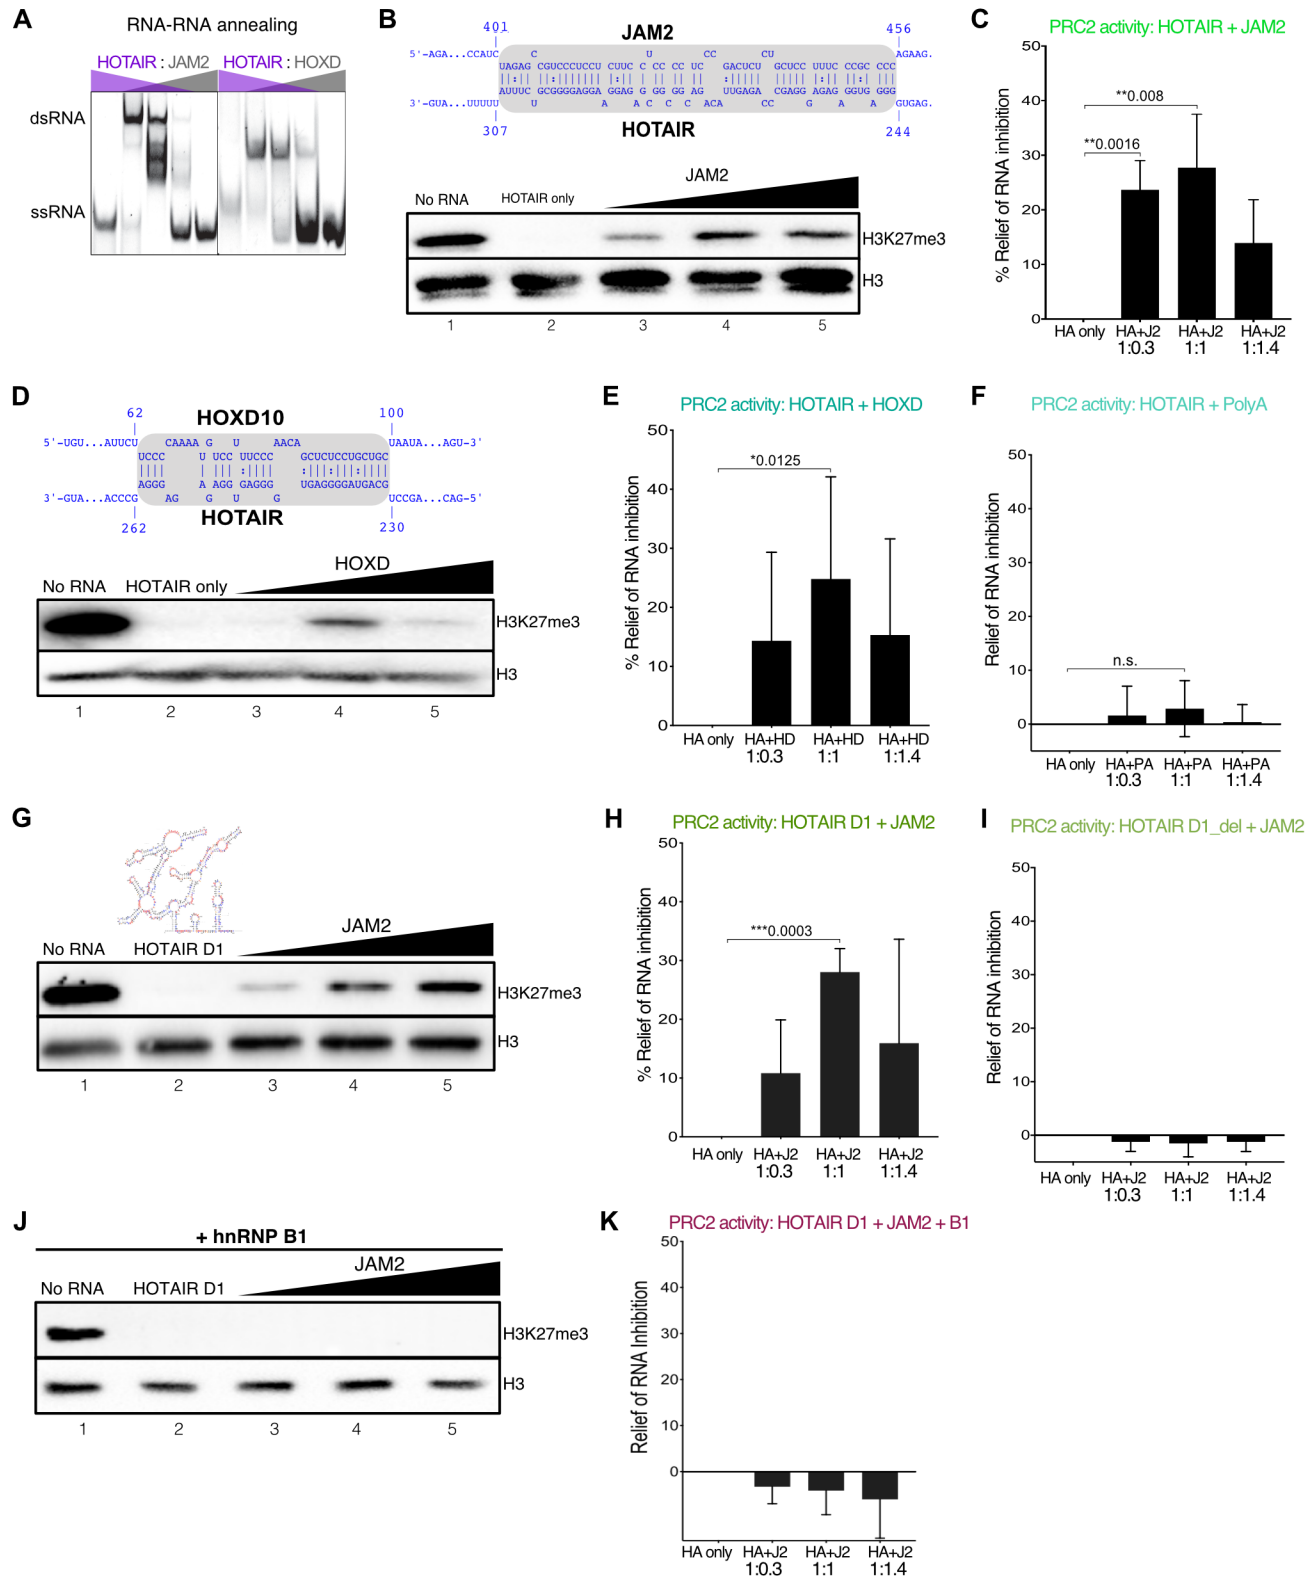

Figure 7

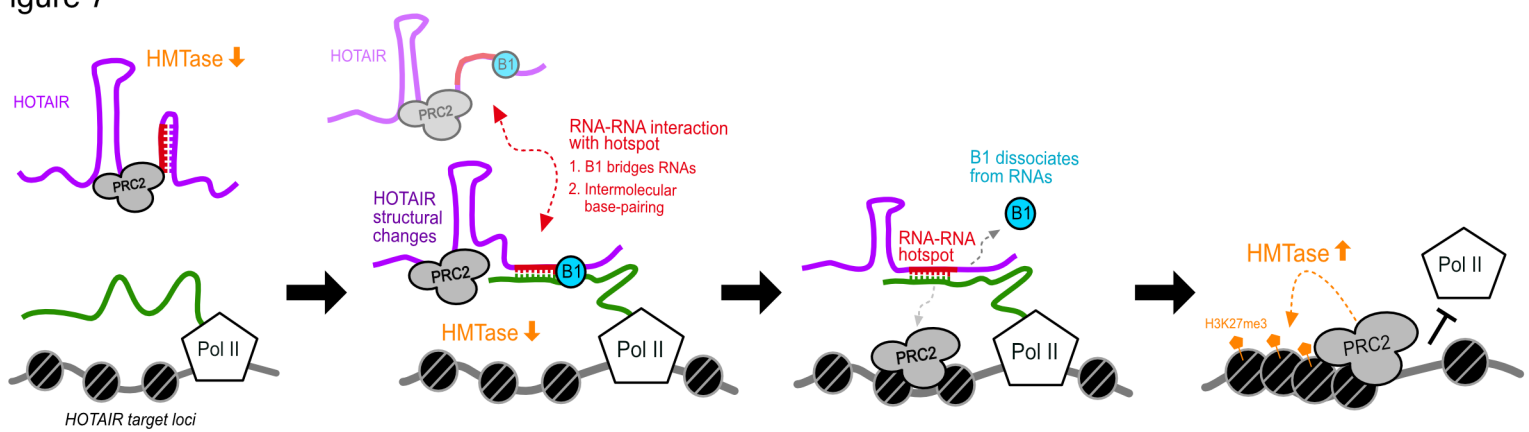

Source: https://www.biorxiv.org/content/biorxiv/early/2020/12/30/2020.04.13.040071.full.pdf
